1 **Title: Short-term assessment of subfoveal injection of AAV2-*hCHM* gene augmentation in**  
2 **choroideremia using adaptive optics ophthalmoscopy**

3

4 **Authors:** Jessica I. W. Morgan<sup>1,2,\*</sup>, Yu You Jiang<sup>1,2</sup>, Grace K. Vergilio<sup>1,2</sup>, Leona W. Serrano<sup>1,2</sup>,  
5 Denise J. Pearson<sup>1,2</sup>, Jean Bennett<sup>1,2</sup>, Albert M. Maguire<sup>1,2</sup>, Tomas S. Aleman<sup>1,2</sup>

6

7 <sup>1</sup>Scheie Eye Institute, University of Pennsylvania, Philadelphia, Pennsylvania, USA.

8 <sup>2</sup>Center for Advanced Retinal & Ocular Therapeutics, University of Pennsylvania, Philadelphia,  
9 Pennsylvania, USA.

10 \*To whom correspondence should be addressed: [jwmorgan@penmedicine.upenn.edu](mailto:jwmorgan@penmedicine.upenn.edu)

11

12 **Abstract**

13 Subretinal injection for gene augmentation in retinal degenerations forcefully detaches the neural  
14 retina from the retinal pigment epithelium (RPE), potentially damaging photoreceptors and/or  
15 RPE cells. Here, we use adaptive optics scanning light ophthalmoscopy (AOSLO) to assess the  
16 short-term integrity of the cone mosaic following subretinal injections of AAV2-*hCHM* gene  
17 augmentation in subjects with choroideremia (CHM). Nine adult CHM patients received  
18 unioocular subfoveal injections of low dose ( $5 \times 10^{10}$  vector genome (vg) per eye, n=5) or high  
19 dose ( $1 \times 10^{11}$  vg per eye, n=4) AAV2-*hCHM*. The macular regions of both eyes were imaged pre-  
20 and one-month post-injection using a custom-built, multimodal AOSLO. Post-injection cone  
21 inner segment mosaics were compared to pre-injection mosaics at multiple regions of interest  
22 (ROIs). Post-injection AOSLO images showed preservation of the cone mosaic in all 9 AAV2-  
23 *hCHM* injected eyes. Mosaics appeared intact and contiguous one-month post-injection, with the  
24 exception of foveal disruption in one patient. Co-localized optical coherence tomography showed  
25 foveal cone outer segment (COS) shortening post-injection (significant, n=4; non-significant,  
26 n=4; unchanged, n=1). Integrity of the cone mosaic is maintained following subretinal delivery  
27 of AAV2-*hCHM*, providing strong evidence in support of the safety of the injections. Minor  
28 foveal thinning observed following surgery corresponds with short-term COS shortening rather  
29 than cone cell loss.

30

31 **Introduction**

32 The advent of gene therapy for inherited retinal degenerations has revolutionized the field  
33 of ophthalmic care.<sup>1</sup> The FDA's recent approval of LUXTURNA® has provided the first clinical  
34 available treatment option for RPE65 associated inherited retinal degeneration<sup>2</sup> and given hope  
35 to numerous other patients who suffer from genetic blinding disease without available  
36 treatments.<sup>3</sup> Indeed, numerous clinical trials testing gene augmentation to treat other inherited  
37 retinal degenerations (IRDs) are being conceived or are in progress.<sup>4-6</sup>

38 Choroideremia (CHM) is one such IRD where gene augmentation is being tested in  
39 multi-institutional gene therapy clinical trials.<sup>7-18</sup> CHM is an X-linked degeneration caused by  
40 mutations in the *CHM* gene, which encodes Rab Escort Protein 1 (REP1), a protein thought to be

41 involved in membrane trafficking.<sup>19,20</sup> Mutations in *CHM* lead to progressive degeneration of the  
42 photoreceptors, retinal pigment epithelium (RPE), and choroid.<sup>21-24</sup> Patients with CHM typically  
43 present in their youth with nyctalopia and visual field defects. The earliest clinically detectable  
44 abnormalities include RPE demelanization, disruption of the photoreceptor outer segments, and  
45 severe rod photoreceptor dysfunction starting in the near mid-peripheral retina.<sup>25-27</sup> Cone  
46 dysfunction as well as centrifugal and centripetal movement of the degenerative process<sup>21,27</sup>  
47 causes progressive constriction of the visual field and eventual involvement of the foveal center,  
48 which results in degraded visual acuity typically in the fifth decade of life.<sup>21,25,27-29</sup>

49 Retinal imaging in CHM has demonstrated retained central islands of neural retina, with  
50 sharp borders demarcating the transition to severely degenerated areas within or in the periphery  
51 of the retained islands.<sup>29,30</sup> Cross sectional imaging with optical coherence tomography (OCT)  
52 has revealed that, independent of the cellular origin of the primary mechanism of disease,  
53 shortening or loss of the photoreceptor outer segments are the earliest clinically detectable  
54 abnormalities, preceding overt structural loss within the RPE and choroid.<sup>21,24,27,29,31</sup>

55 At the cellular level, imaging with adaptive optics scanning laser ophthalmoscopy  
56 (AOSLO) has enabled visualization of the photoreceptor mosaic both in health and disease.<sup>32</sup>  
57 This technique involves measuring and compensating for the optical aberrations of the living  
58 eye, in order to obtain diffraction limited imaging through the natural pupil of the eye.<sup>33</sup> In  
59 CHM, AOSLO imaging has revealed the photoreceptor mosaic remains contiguous up to the  
60 edge of sharp borders between relatively preserved and atrophic retina.<sup>29,34,35</sup> Within the retained  
61 central islands, local regions of the photoreceptor mosaic can exhibit either normal or reduced  
62 cone densities with dim and mottled waveguided reflectance profiles. AOSLO imaging  
63 combined with nearly cellular-level measures of vision, or adaptive optics (AO) microperimetry,  
64 has confirmed the existence of sharp transitions between functioning retina and severe sensitivity  
65 losses that collocate with the observed rapid transitions in retinal structure.<sup>30</sup> The results suggest  
66 the RPE, in addition to rods, is an autonomous site of degeneration in CHM. Cones ultimately  
67 are lost as well, either by mechanisms that occur in parallel or as a consequence of severe RPE  
68 and/or choroidal changes.<sup>21,27,29,30,34,36-39</sup>

69 Current gene augmentation strategies for treating CHM target these residual islands of  
70 viable retina hoping to maintain or improve levels of central vision that are often above the legal  
71 limit of blindness, albeit associated with very constricted visual fields.<sup>21</sup> Delivering normal  
72 copies of the *CHM* gene aimed at restoring REP1 function is currently performed by a subretinal  
73 injection.<sup>7,17</sup> The procedure is not without risk, in that it involves forcefully delivering a fluid  
74 under the neural retina, thus separating the photoreceptors within the residual island from the  
75 underlying supportive RPE. This process of intentionally detaching the photoreceptors from the  
76 RPE has the potential to damage the structural integrity of the entire retina, particularly the RPE  
77 and photoreceptors. In the present study, we use AOSLO to gain insight into the short-term  
78 changes of the cone mosaic following macular subretinal injections of AAV2-*hCHM* in CHM  
79 subjects. We evaluate the cone mosaic structure in conjunction with foveal measures of cone  
80 outer segment length and vision prior to and one-month after the subfoveal injections.

81

## 82 **Methods**

### 83 *Subjects and General Procedures*

84 This research adhered to the Declaration of Helsinki and was approved by the  
85 Institutional Review Boards at the University of Pennsylvania and The Children’s Hospital of  
86 Philadelphia. All nine participants provided informed consent before voluntarily enrolling in the  
87 study. The subjects also provided informed consent and were enrolled in a dose escalation Phase  
88 1/2 clinical trial testing the safety of the subretinal delivery of AAV2-*hCHM* in subjects with  
89 CHM (ClinicalTrials.gov identifier NCT02341807). Inclusion criteria included male gender, 18  
90 years of age or older, confirmed disease-causing *CHM* gene mutation, central visual field  
91 constriction <30 degrees in at least one of 24 meridians, visual acuity better than 20/200,  
92 interocular symmetry in disease severity, exclusion of systemic or ocular diseases or medications  
93 that could potentially interfere with the disease process or delivery of the subretinal injection,  
94 and compliance with the clinical trial study protocol.

95 Subjects underwent a complete ophthalmic examination before and one month after the  
96 subretinal delivery of AAV2-*hCHM*, including dark-adapted foveal sensitivity testing, OCT and  
97 AOSLO imaging. Cone sensitivity was measured at the fovea using a modified Humphrey Field  
98 Analyzer (HFA II-I, Carl Zeiss Meditec, Dublin, CA) using a 1.75 degree diameter, 650 nm  
99 stimuli presented at the foveal center following 30 minutes of dark adaptation.<sup>21</sup> Axial lengths  
100 for both eyes were recorded using an IOL-Master® (Carl Zeiss Meditec, Dublin, CA). All  
101 AOSLO images were proportionally scaled by axial length as has been done previously. Within  
102 87 days from the baseline imaging session (mean  $27 \pm 25$  days, range 4 – 87 days), subjects then  
103 received unilateral subretinal injection of low dose (up to  $5 \times 10^8$  vector genome (vg) per eye, n=5)  
104 or high dose (up to  $1 \times 10^9$  vg per eye, n=4) AAV2-*hCHM* per the Phase 1/2 clinical trial protocol.  
105 As previously reported, the injection ‘blebs’ covered the entire extent of the residual central  
106 islands including the foveal center. The planned upper limit for the volume of the subretinal  
107 injections was 300  $\mu$ l; the final volume injected was limited to that required to produce a visible  
108 subretinal bleb that covered the residual islands (between 20  $\mu$ l and 100  $\mu$ l).<sup>16</sup> For quantitative  
109 analyses of the OCT cross-sections, images from post-operative visits were co-registered to their  
110 baseline, re-sampled at ten-fold the original resolution. Longitudinal reflectivity profiles (LRPs)  
111 from the foveal center (or juxtafovea in PN07 to avoid retinal tracks and EZ discontinuation)  
112 were generated using ImageJ imaging analysis software (<http://imagej.nih.gov/ij/>; provided in the  
113 public domain by the National Institutes of Health, Bethesda, MD, USA) following published  
114 methodology.<sup>21,40</sup> LRPs aligned by the main RPE/BrM signal peak were used to determine the  
115 inter-peak distance between the EZ signal peak to the peak at the base of the RPE/BrM. The  
116 distance corresponds to the combined length of the photoreceptor inner and outer segment as  
117 well as the height of the RPE or EZ-to-BrM distance. Finally, changes in dark-adapted cone  
118 sensitivity and foveal EZ-to-BrM distance were compared with potential changes in the cone  
119 mosaic morphology as determined by AOSLO imaging.

#### 120 *AOSLO Imaging Procedures and Image Processing*

121 The AOSLO system used in this study has been previously described.<sup>41,42</sup> Briefly, the  
122 custom-built, multi-modal AOSLO apparatus consisted of an 848  $\Delta$ 26 nm superluminescent  
123 diode (SLD) for wavefront sensing and a 795  $\Delta$ 15.3 nm SLD for near-infrared imaging  
124 (Superlum, Cork, Ireland). Wavefront correction was performed using a 97-channel deformable  
125 mirror (Alpao SAS, France). Three photomultiplier tubes (Hamamatsu Corporation) were  
126 configured to record confocal and non-confocal split-detection image sequences at 18 Hz  
127 simultaneously. CHM patients were aligned to the custom-built AOSLO imaging system using a  
128 dental impression. Patients were instructed to fixate at a target using the imaging eye. AOSLO

129 image sequences were acquired using both a 1.75° and 1° square imaging field over the central 3  
130 degrees surrounding fixation and using a 1 square° imaging field from fixation out along each  
131 meridian until reaching the atrophic lesion border or reaching ~15° eccentricity. The custom-  
132 built AOSLO allowed higher resolution imaging (theoretical limit ~2 μm) for visualization of  
133 waveguiding foveal and parafoveal cones as well as the split-detection modality for visualization  
134 of the cone inner segments.

135 Image sequences from the custom built AOSLO were desinused, and several reference  
136 frames were chosen automatically from each image sequence using a custom MATLAB  
137 algorithm based on the method published by Salmon et al.<sup>43</sup> Custom software was used to  
138 remove intra-frame distortions caused by eye motion and 50 frames of the AOSLO image  
139 sequence were registered.<sup>44</sup> Registered frames were then averaged together and the averaged  
140 image was dedistorted using a custom MATLAB algorithm based on Bedggood and Metha<sup>45</sup> to  
141 remove distortions caused by eye motion within the reference frame. The dedistorted images  
142 acquired from within a single imaging session were then automatically montaged using  
143 MATLAB as previously described.<sup>46</sup> This montaging step of the analysis was supplemented with  
144 manual image alignments at retinal locations where an automated match was not found, but an  
145 image was acquired. AOSLO image montages from each time point were then manually aligned  
146 to each other longitudinally using Adobe Photoshop. Macroscopic image features, such as blood  
147 vessels and the contours of the central island, from the full montage were used for a gross, initial  
148 longitudinal alignment; the longitudinal alignment was then refined for cone-by-cone accuracy  
149 over regions of interest (ROIs). When necessary, one-month images were scaled to the baseline  
150 images.

151

### 152 *Cone Density Measurements*

153 Four ROIs from each eye were selected for measurement of cone densities. ROIs were  
154 manually cropped from both the baseline and one-month post-injection split detection AOSLO  
155 montages for both injected and control eyes of all subjects. Cones were manually identified using  
156 custom software. One grader, JIWM, identified cones in all ROIs. The grader was masked to  
157 treated vs control eye and time point for each subject. The grader was able to adjust the  
158 brightness and contrast of the image both in linear and logarithmic displays while selecting cones  
159 within the ROIs. Cone centers were used to determine the Voronoi boundaries for each selected  
160 cone and bound cone density was calculated for each ROI.<sup>47</sup> Cone densities were compared  
161 between control and injected eyes at each time point and between time points for control and  
162 injected eyes. Paired t-tests were used to determine statistical differences at p<0.05.

163

## 164 **Results**

165 Nine molecularly confirmed CHM subjects participated in the study. Subject  
166 characteristics are shown in **Table 1**. Subjects ranged in age from 26-50 years at the time of  
167 enrollment. As previously reported, surgeries were uneventful.<sup>16</sup> Axial lengths ranged from  
168 23.33 – 26.95 mm (mean ± standard deviation: 25.01 ± 1.21 mm). Foveal cone sensitivity was  
169 unchanged at one-month post injection for 8 of 9 injected eyes and all 9 control eyes. One  
170 subject, PN-11 showed a significant loss in foveal cone sensitivity in the injected eye (**Table 1**).



171 As previously reported,<sup>16</sup> this same subject demonstrated a significant loss in visual acuity (3  
172 lines) in the injected eye while all other visual acuities remained unchanged.

173

#### 174 *Shortening of Cone Outer Segments after Subretinal Gene Therapy*

175 Overall, at one-month post-injection OCTs show that compared to baseline images the  
176 laminar architecture of the retina is qualitatively unchanged in both the injected and uninjected  
177 eyes and that the subretinal bleb containing AAV2-*hCHM* has resolved in injected eyes (**Figure**  
178 **1**). Quantitative analyses showed a normal foveal ellipsoid zone (EZ)-to-RPE/Bruch's membrane  
179 (BrM) distance (mean normal +2SD =  $52 \pm 15 \mu\text{m}$ ) at baseline in all subjects, except PN05 and  
180 PN07 with the most severe foveal abnormalities. At the one-month post-injection time point,  
181 however, there was shortening of this distance in the AAV2-*hCHM* injected eyes, suggestive of  
182 foveal cone outer segment shortening (**Figure 1C**). The differences between the measures at one-  
183 month and baseline exceeded the variability of the measurements ( $\pm 4.42 \mu\text{m}$ ) (Figure 1C,  
184 dashed lines) in four subjects, was borderline significant in another four subjects, and unchanged  
185 in one subject. The EZ-to-RPE distance in uninjected eyes remained unchanged at the one-month  
186 time point compared to baseline measurements.

187

#### 188 *Photoreceptor Mosaic Integrity and Cone Photoreceptor Density*

189 Non-confocal split detection AOSLO at baseline revealed the photoreceptor mosaic  
190 within the central island of remaining retina was intact and contiguous out to the border of  
191 atrophy, at which point, the photoreceptor mosaic exhibited a sharp transition to atrophic retinal  
192 regions. AOSLO at one-month post-injection also revealed a contiguous mosaic in 8 of 9  
193 injected eyes and all 9 uninjected eyes (**Figure 2, Supplemental Figures 1-8**). Global features  
194 within the AOSLO montage and photoreceptor mosaic could be aligned longitudinally between  
195 time points. Local distortions in adjacent images both within and between timepoints however,  
196 precluded cone-by-cone alignment across the full montage in both injected and uninjected eyes.  
197 Thus, ROIs within the cone mosaic were selected for cone-by-cone alignment across time points  
198 using rigid transforms (translation, rotation, scale) only (**Supplemental Figure 2**). Cone-by-cone  
199 alignment was attained at multiple retinal locations within the montage in all eyes, including  
200 both injected and uninjected eyes. Qualitatively, this manual alignment was easier to perform in  
201 uninjected eyes and ROIs in uninjected eyes showed accurate cellular alignments over a larger  
202 distance than ROIs in injected eyes.

203 Cones could be manually identified and bound cone density determined for longitudinally  
204 aligned ROIs in all eyes (**Figure 3**). Cone densities were similar across timepoints for all ROIs in  
205 both injected and uninjected eyes (**Figure 4**). In injected eyes, cone density (mean  $\pm$  standard  
206 error) was  $24,027 \pm 1,991$  cones/ $\text{mm}^2$  at one-month post-injection compared to  $24,401 \pm 2,361$   
207 cones/ $\text{mm}^2$  at baseline. Cone densities in uninjected eyes were  $24,284 \pm 3,051$  cones/ $\text{mm}^2$  at one-  
208 month compared to  $24,491 \pm 3,022$  cones/ $\text{mm}^2$  at baseline (**Table 2**). Summarizing across all  
209 ROIs, there was no statistical difference observed between cone densities measured in injected  
210 and uninjected eyes at either timepoint ( $P=0.97, 0.91$  for baseline and one-month time points  
211 respectively). There was no significant difference in the difference in cone density between  
212 injected and uninjected eyes ( $P=0.80$ ) and no significant difference in the percent differences in  
213 cone density between injected and uninjected eyes ( $P=0.60$ ).

214 One-month post-injection AO images of subject PN-09 revealed a local loss of cones at  
215 the fovea (**Figure 5**). This area of cone loss was co-located with the retinal region that revealed a  
216 loss of foveal sensitivity at the one-month post-injection timepoint. Despite the foveal cone loss,  
217 cones were visible in the surrounding parafoveal regions at the same time point. Similar to the  
218 other subjects, the photoreceptor mosaic was intact at regions outside of the fovea for PN-09,  
219 longitudinal alignments of the cone mosaic were possible, and cone densities were unchanged in  
220 ROIs selected for cone density quantifications.

221

## 222 **Discussion:**

223 Treating CHM by gene augmentation represents a significant departure from the  
224 treatment scenario of the earlier experience in *RPE65*-IRDs that culminated with the first FDA-  
225 approved gene therapy product for use in the clinic.<sup>3,18</sup> In mid- to end-stage CHM, there is no  
226 alternative but to treat small fragile central islands of relatively preserved retina that sustain  
227 limited fields of vision that often support reading levels that are above the legal limit of  
228 blindness. The scenario is quite different from the treatment of functionally blind retinas that are  
229 less fragile in diseases within the spectrum of *RPE65*-LCA.<sup>3,18</sup> In fact, the resulting shift in the  
230 benefit-to-risk ratio is to be expected for the larger group of non-LCA IRDs at the disease stages  
231 that are typically considered for initial clinical trials, making CHM a model for an entire group  
232 of genetic retinal diseases that await treatment solutions. Although the safety profile of the  
233 subretinal injections is now better understood, quantitative approaches, particularly at the cellular  
234 level, are needed to understand the mechanisms that lead to unwanted outcomes, particularly  
235 when the remaining vision is threatened by an invasive procedure, such as a therapeutic retinal  
236 detachment. In the current study we used OCT and AOSLO imaging to document possible short-  
237 term changes of the photoreceptor mosaic following subfoveal injections of *AAV2-hCHM*. We  
238 demonstrate that at one-month post-injection the cone mosaic resettled on the RPE following  
239 resolution of the subretinal bleb. The cone mosaic remained intact in eight of nine subjects  
240 (except PN09), and outside of the foveal center in all subjects. Quantification of cone densities  
241 revealed no measurable difference between the injected and uninjected eyes and no measurable  
242 changes in cone densities between baseline and one-month post-injection. These results show  
243 there was no significant widespread cone loss across the retained area of central retina targeted  
244 by the retinal detachment in any of the nine CHM subjects included in this study. Thus, we make  
245 two important conclusions regarding the safety of the *AAV2-hCHM* experimental therapy. First,  
246 cone photoreceptors did not drop out as a consequence of mechanical or acute inflammatory  
247 changes in response to the presence of *AAV2-hCHM* in the subretinal space. Second, the  
248 therapeutic retinal detachment, as performed by us, did not result in detectable short-term  
249 changes of the density of the photoreceptor mosaic, although mild shortening of the  
250 photoreceptor outer segments was detected. Altogether, our results provide safety information at  
251 the cellular level for both the surgical technique and the *AAV2-hCHM* study agent confirming  
252 histologic/cellular-level safety signals that up to now were only available through  
253 histopathologic studies in normal non-human primates.<sup>48-52</sup>

254 The subretinal injection however, is not without risk. Foveal thinning and the occurrence  
255 of full thickness loss of retinal tissue (macular holes) are known complications of the procedure.<sup>3</sup>  
256 The loss of the photoreceptors at the fovea in one of our study subjects (PN09) raises the  
257 possibility of individual vulnerability to the subfoveal injection, an issue reported in at least one  
258 subject in each of the CHM gene therapy clinical trial reports.<sup>18</sup> PN-09's surgery was considered

259 uneventful. It is unclear why the photoreceptors at the fovea of PN-09 did not withstand the  
260 subfoveal injection, however, because the parafoveal cones did survive the intervention, we  
261 suggest that the cone loss may have resulted from mechanical factors of the surgery rather than  
262 toxicity to the study agent. All study subjects were at a similar stage of their central retinal  
263 disease with remodeled foveas that were within normal limits of thickness (except PN05) or even  
264 thicker than normal.<sup>21,27</sup> In fact, two patients (PN07 and PN08) showed proximity of the  
265 transitional zones of structural disorganization to the foveal center, a factor known to predict the  
266 decline in visual acuity as part of the natural history of the disease,<sup>21</sup> yet they did not have an  
267 unfavorable outcome.<sup>16</sup> Inspection of PN09's OCT cross-sections reveals faint EZ and IZ signal  
268 that may be indicative of fragile or more abnormal photoreceptor inner and outer segments, as  
269 has been described in certain forms of cone photoreceptor inherited degenerations, or cone and  
270 cone-rod dystrophies.<sup>53,54</sup> Perhaps these may be structural signs that dictate modified surgical  
271 approaches. Efforts to de-risk the subretinal injections with the introduction of mechanical  
272 devices that deliver precise volumes at prescribed hydrostatic pressures, as well as with the use  
273 of intraoperative SD-OCT systems that allow real time view of the microscopic retinal detail  
274 during the surgical interventions are some of the options.<sup>55,56</sup> Further studies are needed to  
275 address predisposing factors in patients with similar outcomes, as well as to determine the impact  
276 that alternative approaches to deliver gene therapy products to the desired cellular targets have  
277 on the health of the foveal photoreceptors.

278 Our OCT results at one-month post-injection showed a decrease in outer segment length  
279 in comparison to baseline thickness measurements. Preliminary results reported from Clinical  
280 Trial NCT02341807 showed that the foveal thickness slowly recovers over 6 months post-  
281 injection.<sup>16</sup> This, taken together with the AO imaging results, leads to the conclusion that the  
282 measured decrease in thickness is caused by short-term outer segment shortening as opposed to  
283 cone loss. We hypothesize the forced detachment between the outer segment tips and the RPE  
284 from the surgical injection rather than the vector itself causes this short-term shortening of the  
285 outer segments. For unknown reasons the recovery of the outer segment length after retinal  
286 detachments follows a time course that defers from the normal renewal rate of the outer segment,  
287 and seems to be independent of the cause of the retinal detachment, whether short-lived and  
288 intentional, such as during the delivery of gene therapy products by subretinal injections, or after  
289 spontaneous primary macula-off detachments.<sup>57-59</sup> Beyond purely mechanical factors affecting  
290 the outer retina, complex interactions are known to occur after retinal detachments, which may  
291 include the modulation of the structural outcome by variables inherent to the preexisting retinal  
292 degeneration, such as the response of the inner retina and the underlying RPE to the therapeutic  
293 detachment, topics in need of investigation.<sup>60-63</sup>

294 Although there have been reports documenting the safety of subretinal injections  
295 targeting the macula in CHM and other IRDs, this work is, to our knowledge, the first study to  
296 apply AO ophthalmoscopy to investigate the effect of an experimental gene therapy intervention  
297 for a blinding disease. Gene therapy aims to prevent cellular death and/or restore function to  
298 cells that are still surviving the genetic abnormality and AO ophthalmoscopy enables  
299 noninvasive visualization of individual cells. As a practical matter, the design and economics of  
300 gene therapy clinical trials puts a high value on accurately measuring outcomes reasonably soon  
301 after the experimental interventions. The Spark-funded clinical trial for CHM did not include AO  
302 imaging as an outcome measure, but the results from this ancillary study suggest that AO might  
303 be suitable as a precise anatomic outcome measure in future trials involving subretinal injections.  
304 Indeed, AO ophthalmoscopy is uniquely positioned to answer this need by allowing in-vivo and

305 non-invasive visualization of the cellular targets of such interventions, particularly in disease  
 306 states, such as neurodegenerations, where biopsies or other biologic markers of treatment effects  
 307 are not available. Further, techniques such as optoretinography<sup>64-68</sup> and AO microperimetry<sup>30,69-71</sup>  
 308 have complemented AO imaging by allowing the direct or indirect evaluation of photoreceptor  
 309 visual function at the cellular level. The emergence of these tools may prove impactful for  
 310 assessing the short- and long-term safety and efficacy of gene therapies for blinding diseases.

311 In conclusion, our data support the short-term safety of subretinal injections of AAV2-  
 312 *hCHM* as a treatment of CHM. Additional follow up will be required to assess the long-term  
 313 safety and efficacy of subretinal injection and delivery of AAV2-*hCHM* for preventing or  
 314 restoring vision loss caused by CHM.

315

316

317

318 **Table 1:** Study Subject Characteristics

319

|                                          | Study ID | Study ID* | Age (years) | Visual Acuity <sup>†</sup> |       | Injected Eye | Volume (μl) <sup>†</sup> | Axial length (mm) |       | <i>CHM</i> Mutation   | Change in Cone Sensitivity (dB) |    |
|------------------------------------------|----------|-----------|-------------|----------------------------|-------|--------------|--------------------------|-------------------|-------|-----------------------|---------------------------------|----|
|                                          |          |           |             | OD                         | OS    |              |                          | OD                | OS    |                       | OD                              | OS |
| Low Dose Group<br>5x10 <sup>10</sup> vg  | PN-01    | 13057     | 33          | 20/40                      | 20/32 | OD           | 50                       | 26.81             | 26.95 | c.745del.T            | -1                              | -2 |
|                                          | PN-03    | 13125     | 32          | 20/32                      | 20/25 | OD           | 50                       | 23.44             | 23.33 | c.1437dupA            | 1                               | 4  |
|                                          | PN-04    | 13071     | 33          | 20/25                      | 20/25 | OS           | 120                      | 23.83             | 23.97 | c.1663A>T             | 5                               | 0  |
|                                          | PN-05    | 13004     | 50          | 20/40                      | 20/20 | OD           | 20                       | 26.56             | 26.85 | Large Exon 1 deletion | -4                              | 6  |
|                                          | PN-06    | 13131     | 37          | 20/25                      | 20/25 | OS           | 25                       | 24.99             | 24.76 | c.1327_1328delAT      | -2                              | -2 |
| High Dose Group<br>1x10 <sup>11</sup> vg | PN-07    | 13159     | 43          | 20/25                      | 20/20 | OD           | 100                      | 25.39             | 25.25 | c.1144G>T             | 2                               | 2  |
|                                          | PN-08    | 13039     | 26          | 20/25                      | 20/25 | OD           | 50                       | 25.78             | 25.76 | c.1327_1328delAT      | 0                               | 1  |
|                                          | PN-09    | 13224     | 57          | 20/20                      | 20/20 | OD           | 100                      | 24.30             | 24.36 | c.41dupT              | -12                             | 3  |
|                                          | PN-11    | 13226     | 39          | 20/20                      | 20/20 | OD           | 100                      | 24.06             | 23.85 | c.940-2A>T            | -3                              | -1 |

320 \* ID used in previous cross-sectional studies conducted by our research group.<sup>21,29,30,72</sup>

321 † Previously reported by Aleman et al.<sup>16</sup>

322

323

324

325

326

327 **Table 2:** Comparison of cone density (cones/mm<sup>2</sup>) between injected and uninjected eyes (n=9  
 328 subjects, 18 eyes)

|                                                     | Uninjected eyes<br>Mean (SE) | Injected eyes<br>Mean (SE) | Difference<br>(95% CI)* | P-value* |
|-----------------------------------------------------|------------------------------|----------------------------|-------------------------|----------|
| Baseline                                            | 24491 (3022)                 | 24401 (2361)               | 90 (-4505, 4685)        | 0.97     |
| One-month post-injection                            | 24284 (3051)                 | 24027 (1991)               | 257 (-4119, 4632)       | 0.91     |
| Difference (Baseline –<br>one-month post-injection) | 207 (249)                    | 374 (472)                  | -167 (-1447, 1113)      | 0.80     |
| % difference                                        | 1.20 (1.05)                  | -0.56 (2.56)               | 1.76 (-4.79, 8.32)      | 0.60     |

329 \*From the generalized estimating equations<sup>73</sup> that account for the correlations from repeated  
 330 measures at 4 locations and inter-eye correlation.

331

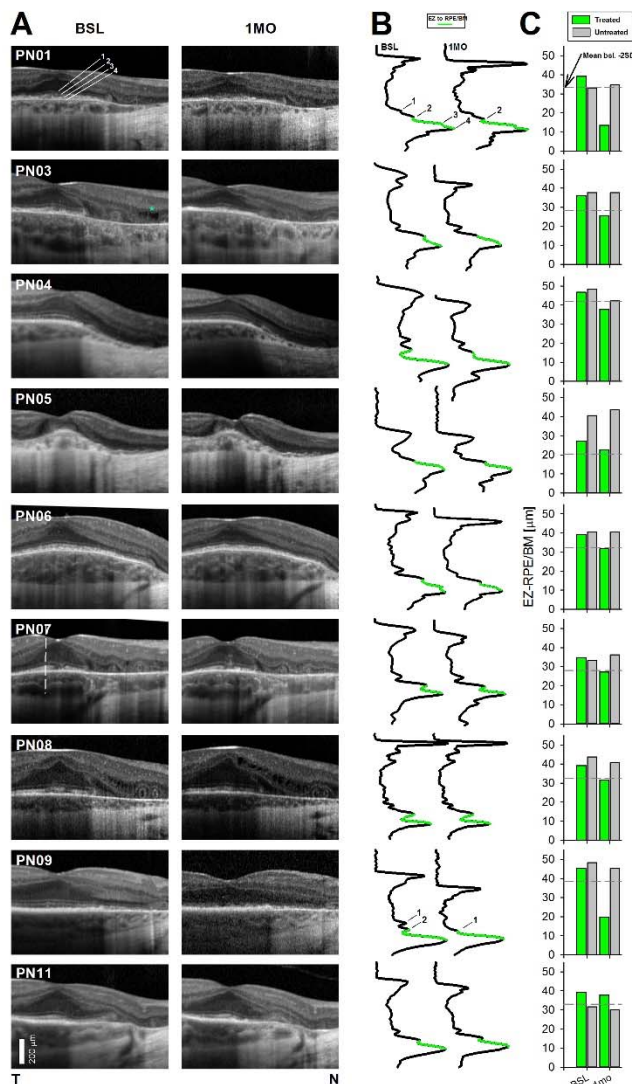

332



333 **Figure 1:** Acute outer retinal changes after the subfoveal subretinal injections. 3 mm SD-OCT  
334 horizontal SD-OCT cross-sections through the fovea at baseline compared to 1 month after the  
335 subretinal injections in the injected eyes (**A**). Outer photoreceptor laminae are labeled in PN01  
336 following convention: 1. external limiting membrane (ELM), 2. Inner segment ellipsoid zone  
337 band (EZ); 3. interdigitation (IZ) of the outer segment with the apical RPE; 4. retinal pigment  
338 epithelium/Bruch's membrane (RPE/BrM) band. Longitudinal reflectivity profiles (LRPs) from  
339 the fovea at 1 month post-injections compared to baseline (**B**). Segment colored green on the  
340 LRPs is the distance from the EZ to RPE/BrM, which relates to the photoreceptor outer segment  
341 (POS) length. EZ-to-RPE/BrM distance in the study eye compared to the control eye for each  
342 subject (**C**). Dashed lines define mean-2SD of the intersession variability of the measures in  
343 uninjected CHM eyes as well as from estimates in normal subjects, which defines limit for  
344 significant thinning of the injected eye.<sup>40</sup> Green bars represent injected eyes, gray bars are  
345 uninjected eyes. The EZ-to-RPE distance was decreased at one-month post-injection compared  
346 to baseline measurements; this shortening was significant in four subjects (PN-01, PN-03, PN-  
347 04, PN-09), borderline significant in another four (PN-05, PN-06, PN-07, PN-08), and  
348 unchanged in one subject (PN-11).

349

## PN-06 Injected Eye

# A

Baseline

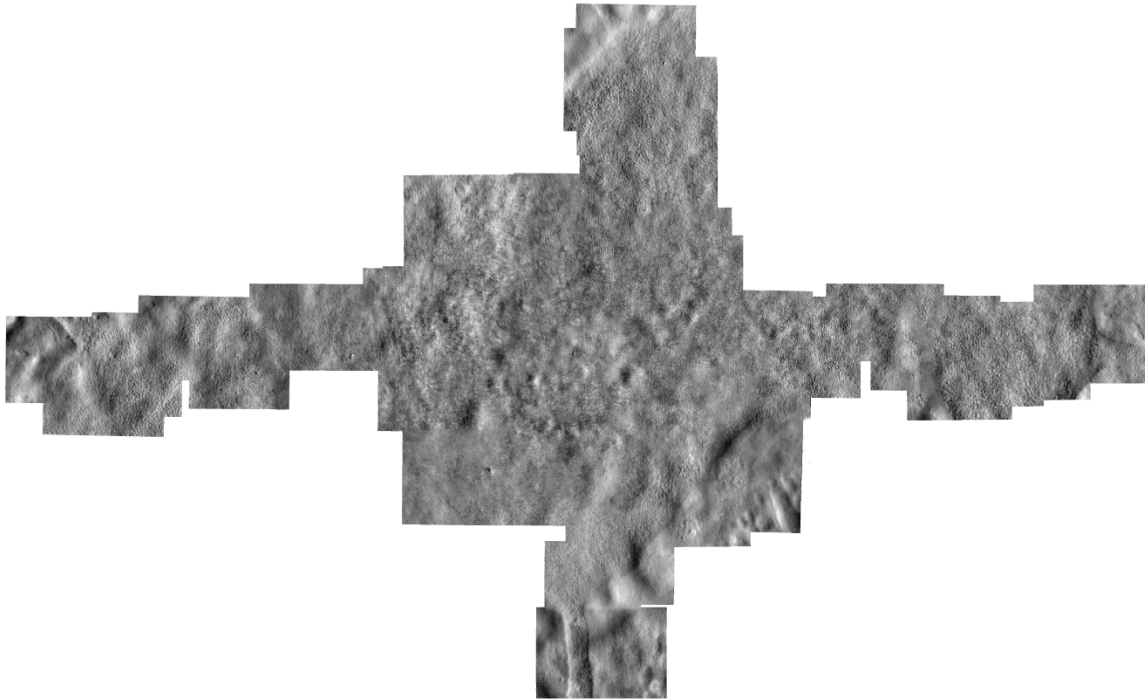

1 month post-injection

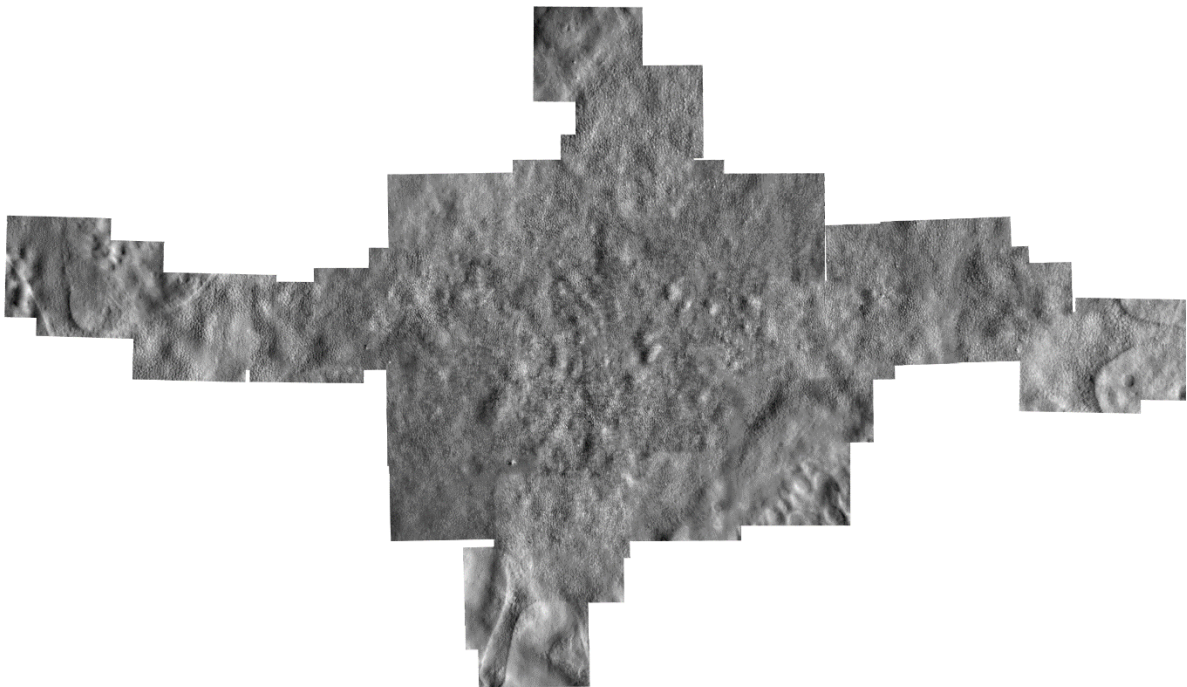

350

PN-06 Uninjected Eye

**B**

Baseline

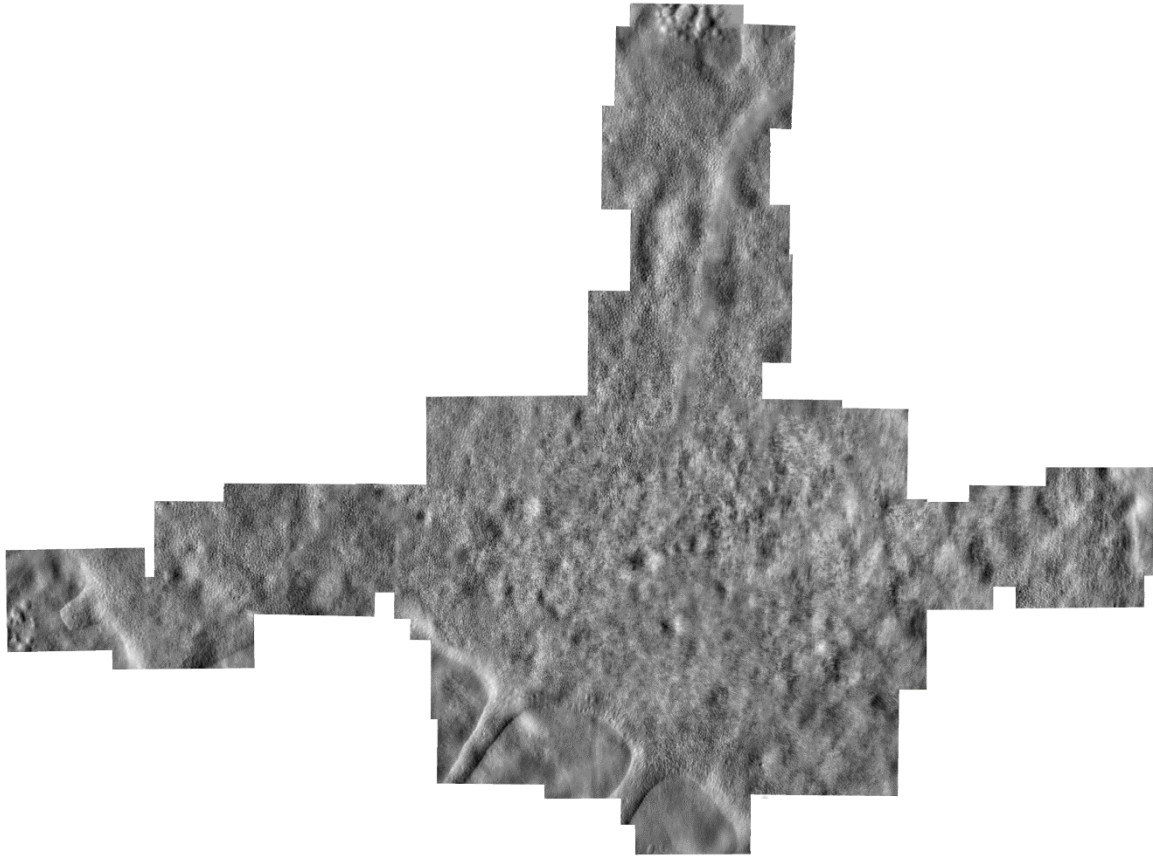

1 month post-injection

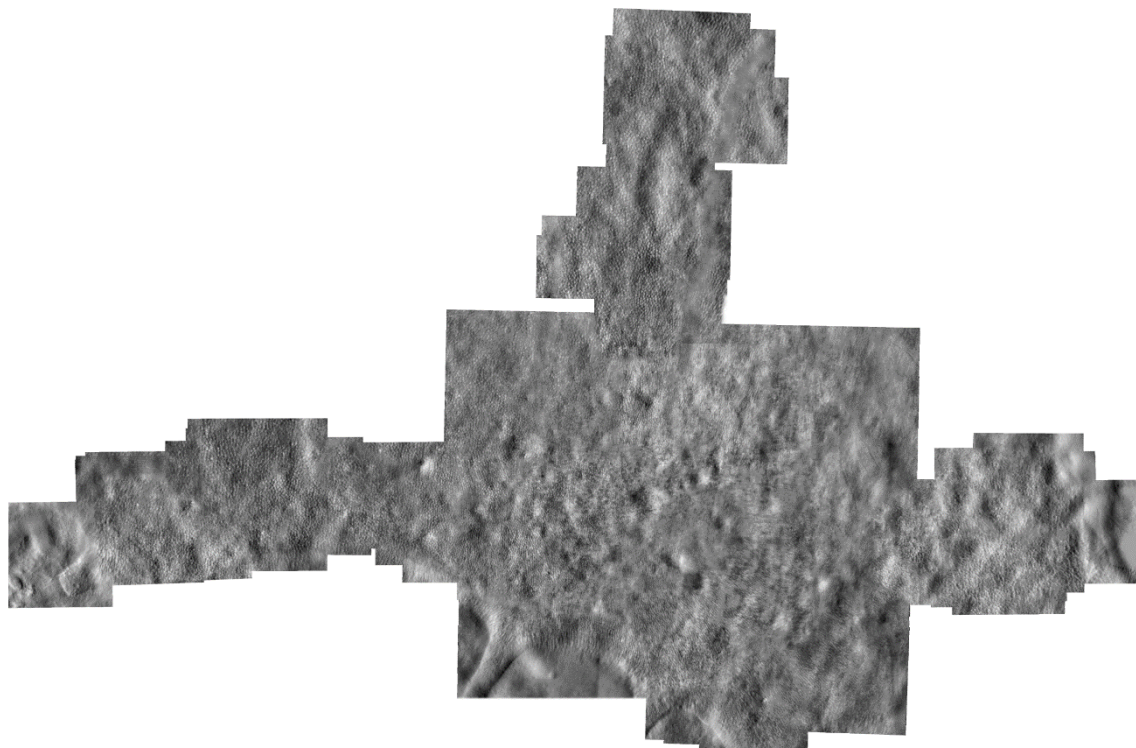



352 **Figure 2:** Nonconfocal split detection AOSLO montage of the photoreceptor inner segment  
353 mosaic at baseline and one-month post-injection in the injected (**A**) and uninjected (**B**) eyes of  
354 PN-06. The same retinal features are observed longitudinally in both eyes and the photoreceptor  
355 mosaic remains intact following the subretinal injection of AAV2.*hCHM*.

356

357

358

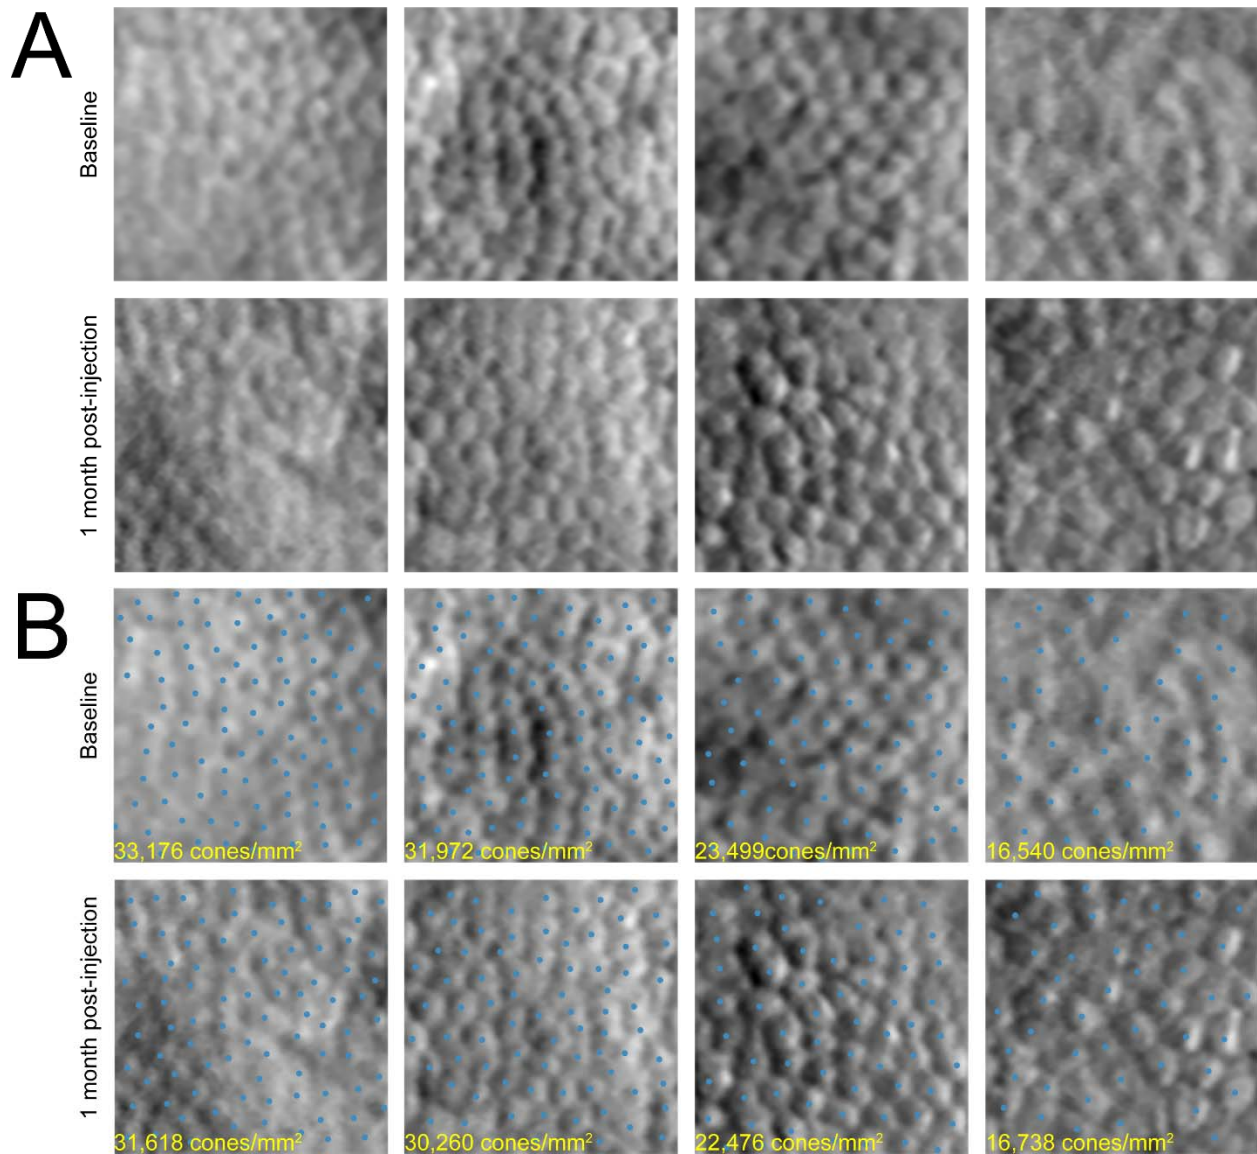

359

360 **Figure 3: A:** Adaptive optics (AO) regions of interest (ROIs) aligned between time points (top  
361 baseline, bottom one-month post-injection) from the injected eye (OS) of subject PN-06. An  
362 intact cone mosaic is visible before and after the subretinal injection of AAV2-*hCHM*. **B:** Cones  
363 were manually identified (blue dots) and bound cone density was calculated for each ROI (cone  
364 densities in yellow for each ROI). No significant changes in cone density were observed between  
365 baseline and one month measurements.

366

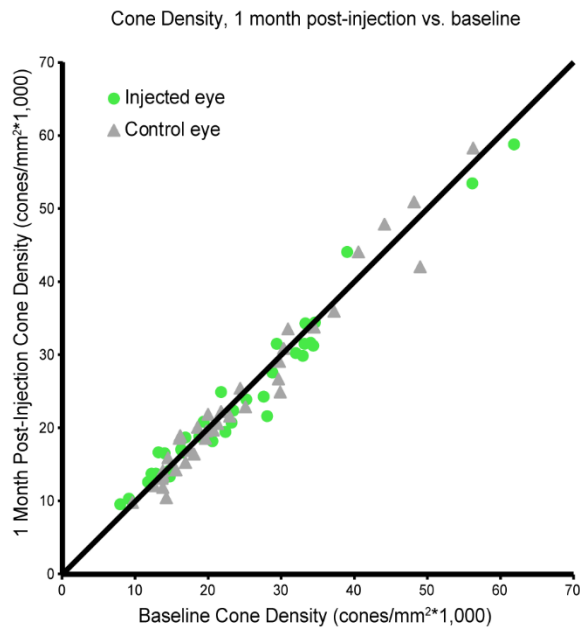

367

368 **Figure 4:** Cone density at one-month post-injection versus baseline. There was no statistical  
369 difference between one-month post-injection measurements and baseline measurements in either  
370 injected or control eyes. Green circles: injected eyes, Gray triangles: control eyes. Black line is  
371 the line of equivalence.

372



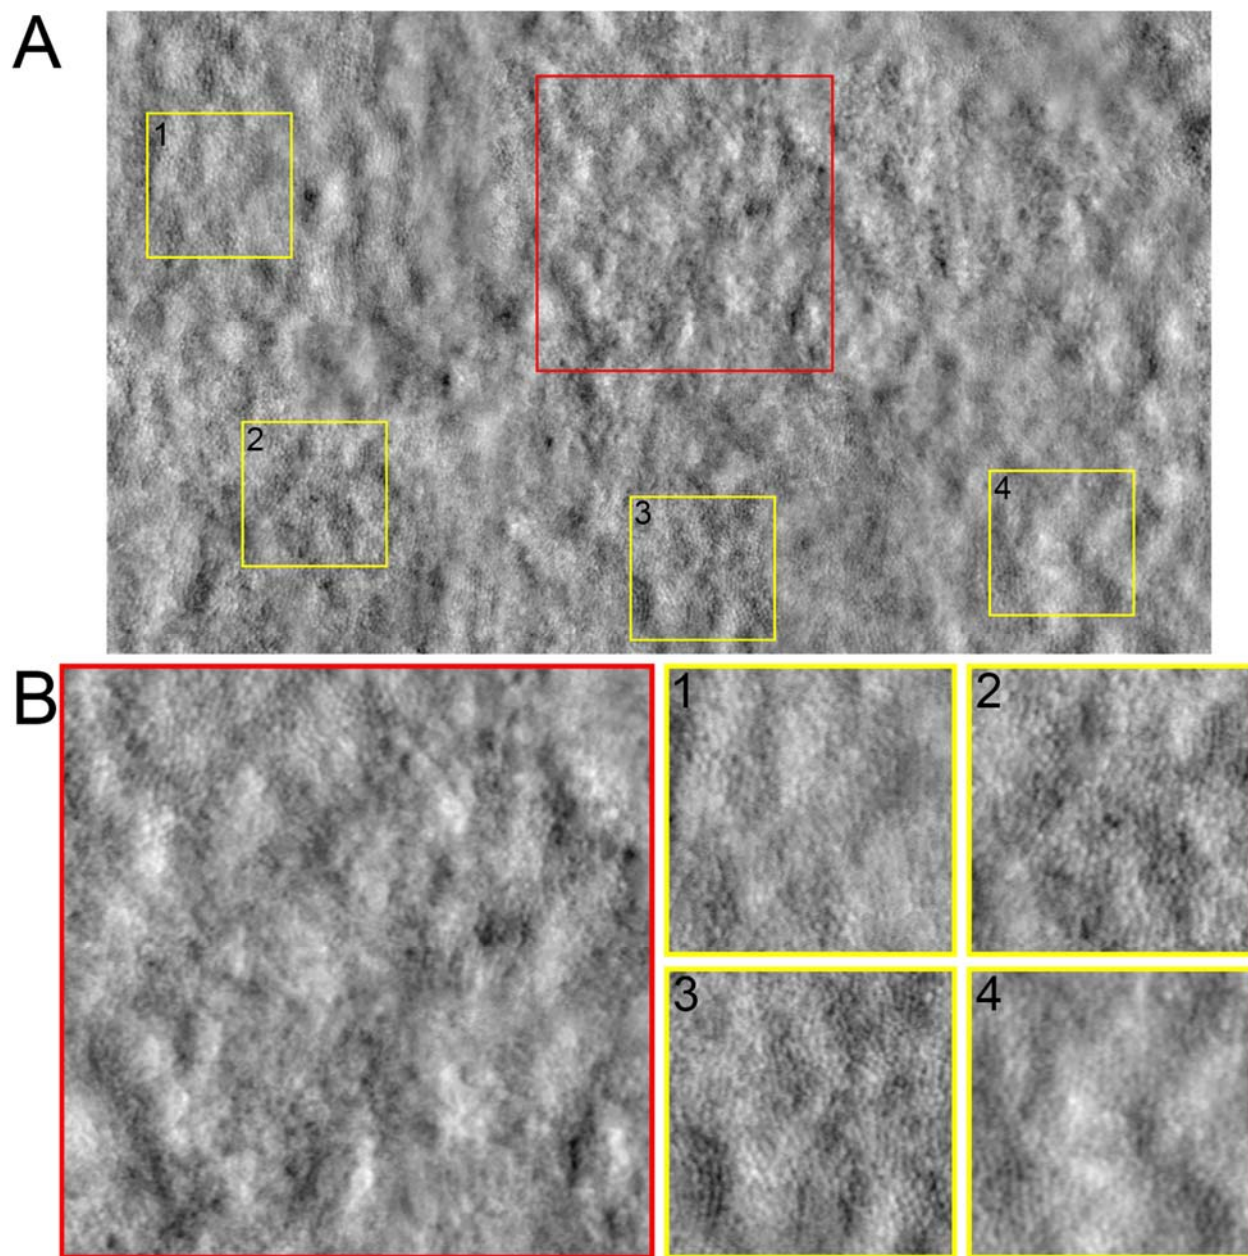

373

374 **Figure 5:** AO nonconfocal split detection montage (A) of the foveal region in the injected eye of  
375 PN-09 at one-month post-injection. B: Enlarged (2x) regions of interest showing a loss of cone  
376 inner segments at the fovea (red box) surrounded by an intact cone inner segment mosaic in the  
377 parafoveal regions (yellow boxes).

378

379

380

381

382

383 **Acknowledgements:** We thank Alfredo Dubra for sharing the adaptive optics scanning laser  
384 ophthalmoscopy optical design, as well as adaptive optics control, image acquisition and image  
385 registration software. We thank Gui-shuang Ying for help with statistical tests. **Funding**  
386 **provided by:** National Institutes of Health (NIH R01EY028601, R01EY030227,  
387 P30EY001583), Foundation Fighting Blindness, F. M. Kirby Foundation, Research to Prevent  
388 Blindness, the Center for Advanced Retinal & Ocular Therapeutics, and the Paul and Evanina  
389 Mackall Foundation Trust. **Competing interests:** AMM receives funding from Spark  
390 Therapeutics and REGENXBIO. JB also received clinical trial support from Spark Therapeutics.  
391 JIWM is an inventor on US Patent 8226236, US Patent App 16/389,942 and receives funding  
392 from AGTC. All data is available by request to the corresponding author.

393

### 394 **References:**

395

- 396 1. MacLaren RE, Bennett J, Schwartz SD. Gene Therapy and Stem Cell Transplantation in  
397 Retinal Disease: The New Frontier. *Ophthalmology*. 2016;123(10S):S98-S106.
- 398 2. Apte RS. Gene Therapy for Retinal Degeneration. *Cell*. 2018;173(1):5.
- 399 3. Maguire AM, Bennett J, Aleman EM, Leroy BP, Aleman TS. Clinical Perspective:  
400 Treating RPE65-Associated Retinal Dystrophy. *Mol Ther*. 2021;29(2):442-463.
- 401 4. Thompson DA, Iannaccone A, Ali RR, et al. Advancing Clinical Trials for Inherited  
402 Retinal Diseases: Recommendations from the Second Monaciano Symposium. *Transl Vis*  
403 *Sci Technol*. 2020;9(7):2.
- 404 5. Garafalo AV, Cideciyan AV, Heon E, et al. Progress in treating inherited retinal diseases:  
405 Early subretinal gene therapy clinical trials and candidates for future initiatives. *Prog*  
406 *Retin Eye Res*. 2020;77:100827.
- 407 6. DiCarlo JE, Mahajan VB, Tsang SH. Gene therapy and genome surgery in the retina. *J*  
408 *Clin Invest*. 2018;128(6):2177-2188.
- 409 7. MacLaren REG, M., Barnard, A.R., Cottrill, C.L., Tolmachova, T., Seymour, L., Clark,  
410 K.R., During, M.J., Cremers, F.P.M., Black, G.C.M., Lotery, A.J., Downes, S.M.,  
411 Webster, A.R., Seabra, M.C. Retinal gene therapy in patients with choroideremia: initial  
412 findings from a phase 1/2 clinical trial. *The Lancet*. 2014.
- 413 8. Edwards TL, Jolly JK, Groppe M, et al. Visual Acuity after Retinal Gene Therapy for  
414 Choroideremia. *N Engl J Med*. 2016;374(20):1996-1998.
- 415 9. Dimopoulos IS, Hoang SC, Radziwon A, et al. Two-Year Results After AAV2-Mediated  
416 Gene Therapy for Choroideremia: The Alberta Experience. *Am J Ophthalmol*.  
417 2018;193:130-142.
- 418 10. Xue K, Jolly JK, Barnard AR, et al. Beneficial effects on vision in patients undergoing  
419 retinal gene therapy for choroideremia. *Nat Med*. 2018;24(10):1507-1512.
- 420 11. Lam BL, Davis JL, Gregori NZ, et al. Choroideremia Gene Therapy Phase 2 Clinical  
421 Trial: 24-Month Results. *Am J Ophthalmol*. 2019;197:65-73.
- 422 12. Fischer MD, Ochakovski GA, Beier B, et al. Changes in Retinal Sensitivity after Gene  
423 Therapy in Choroideremia. *Retina*. 2018.
- 424 13. Cehajic Kapetanovic J, Barnard AR, MacLaren RE. Molecular Therapies for  
425 Choroideremia. *Genes (Basel)*. 2019;10(10).

- 426 14. Cehajic Kapetanovic J, Patricio MI, MacLaren RE. Progress in the development of novel  
427 therapies for choroideremia. *Expert Rev Ophthalmol*. 2019;14(6):277-285.
- 428 15. Fischer MD, Ochakovski GA, Beier B, et al. Efficacy and Safety of Retinal Gene  
429 Therapy Using Adeno-Associated Virus Vector for Patients With Choroideremia: A  
430 Randomized Clinical Trial. *JAMA Ophthalmol*. 2019;137(11):1247-1254.
- 431 16. Aleman TS, Huckfeldt RM, Serrano L, et al. AAV2-hCHM Subretinal Delivery to the  
432 Macula in Choroideremia: 2 year Results of an Ongoing Phase I/II Gene Therapy Trial.  
433 *Invest Ophthalmol Vis Sci*. 2019;60:5173.
- 434 17. Duncan JL. Gene Therapy for Choroideremia-Progress and Remaining Questions. *JAMA*  
435 *Ophthalmol*. 2019;137(11):1254-1255.
- 436 18. MacDonald IM, Moen C, Duncan JL, Tsang SH, Cehajic-Kapetanovic J, Aleman TS.  
437 Perspectives on Gene Therapy: Choroideremia Represents a Challenging Model for the  
438 Treatment of Other Inherited Retinal Degenerations. *Transl Vis Sci Technol*.  
439 2020;9(3):17.
- 440 19. Preising M, Ayuso C. Rab escort protein 1 (REP1) in intracellular traffic: a functional  
441 and pathophysiological overview. *Ophthalmic Genet*. 2004;25(2):101-110.
- 442 20. Fry LE, Patricio MI, Williams J, et al. Association of Messenger RNA Level With  
443 Phenotype in Patients With Choroideremia: Potential Implications for Gene Therapy  
444 Dose. *JAMA Ophthalmol*. 2020;138(2):128-135.
- 445 21. Aleman TS, Han G, Serrano LW, et al. Natural History of the Central Structural  
446 Abnormalities in Choroideremia: A Prospective Cross-Sectional Study. *Ophthalmology*.  
447 2017;124(3):359-373.
- 448 22. Coussa RG, Traboulsi EI. Choroideremia: a review of general findings and pathogenesis.  
449 *Ophthalmic Genet*. 2012;33(2):57-65.
- 450 23. MacDonald IM, Russell L, Chan CC. Choroideremia: new findings from ocular  
451 pathology and review of recent literature. *Surv Ophthalmol*. 2009;54(3):401-407.
- 452 24. Syed N, Smith JE, John SK, Seabra MC, Aguirre GD, Milam AH. Evaluation of retinal  
453 photoreceptors and pigment epithelium in a female carrier of choroideremia.  
454 *Ophthalmology*. 2001;108(4):711-720.
- 455 25. Duncan JL, Aleman TS, Gardner LM, et al. Macular pigment and lutein supplementation  
456 in choroideremia. *Exp Eye Res*. 2002;74(3):371-381.
- 457 26. Heon E, Alabduljalil T, McGuigan ID, et al. Visual Function and Central Retinal  
458 Structure in Choroideremia. *Invest Ophthalmol Vis Sci*. 2016;57(9):OCT377-387.
- 459 27. Jacobson SG, Cideciyan AV, Sumaroka A, et al. Remodeling of the human retina in  
460 choroideremia: rab escort protein 1 (REP-1) mutations. *Invest Ophthalmol Vis Sci*.  
461 2006;47(9):4113-4120.
- 462 28. Coussa RG, Kim J, Traboulsi EI. Choroideremia: effect of age on visual acuity in patients  
463 and female carriers. *Ophthalmic Genet*. 2012;33(2):66-73.
- 464 29. Morgan JI, Han G, Klinman E, et al. High-resolution adaptive optics retinal imaging of  
465 cellular structure in choroideremia. *Invest Ophthalmol Vis Sci*. 2014;55(10):6381-6397.
- 466 30. Tuten WS, Vergilio GK, Young GJ, et al. Visual Function at the Atrophic Border in  
467 Choroideremia Assessed with Adaptive Optics Microperimetry. *Ophthalmol Retina*.  
468 2019;3(10):888-899.
- 469 31. Meschede IP, Burgoyne T, Tolmachova T, Seabra MC, Futter CE. Chronically shortened  
470 rod outer segments accompany photoreceptor cell death in Choroideremia. *PLoS One*.  
471 2020;15(11):e0242284.

- 472 32. Morgan JI. The fundus photo has met its match: optical coherence tomography and  
473 adaptive optics ophthalmoscopy are here to stay. *Ophthalmic Physiol Opt.*  
474 2016;36(3):218-239.
- 475 33. Liang J, Williams DR, Miller DT. Supernormal vision and high-resolution retinal  
476 imaging through adaptive optics. *Journal of the Optical Society of America A.*  
477 1997;14(11):2884-2892.
- 478 34. Syed R, Sundquist SM, Ratnam K, et al. High-resolution images of retinal structure in  
479 patients with choroideremia. *Invest Ophthalmol Vis Sci.* 2013;54(2):950-961.
- 480 35. Sun LW, Johnson RD, Williams V, et al. Multimodal Imaging of Photoreceptor Structure  
481 in Choroideremia. *PLoS One.* 2016;11(12):e0167526.
- 482 36. Tolmachova T, Wavre-Shapton ST, Barnard AR, MacLaren RE, Futter CE, Seabra MC.  
483 Retinal pigment epithelium defects accelerate photoreceptor degeneration in cell type-  
484 specific knockout mouse models of choroideremia. *Invest Ophthalmol Vis Sci.*  
485 2010;51(10):4913-4920.
- 486 37. Wavre-Shapton ST, Tolmachova T, Lopes da Silva M, Futter CE, Seabra MC.  
487 Conditional ablation of the choroideremia gene causes age-related changes in mouse  
488 retinal pigment epithelium. *PLoS One.* 2013;8(2):e57769.
- 489 38. Foote KG, Roorda A, Duncan JL. Multimodal Imaging in Choroideremia. *Adv Exp Med*  
490 *Biol.* 2019;1185:139-143.
- 491 39. Esteve-Rudd J, Hazim RA, Diemer T, et al. Defective phagosome motility and  
492 degradation in cell nonautonomous RPE pathogenesis of a dominant macular  
493 degeneration. *Proc Natl Acad Sci U S A.* 2018;115(21):5468-5473.
- 494 40. Nti AA, Serrano LW, Sandhu HS, et al. FREQUENT SUBCLINICAL MACULAR  
495 CHANGES IN COMBINED BRAF/MEK INHIBITION WITH HIGH-DOSE  
496 HYDROXYCHLOROQUINE AS TREATMENT FOR ADVANCED METASTATIC  
497 BRAF MUTANT MELANOMA: Preliminary Results From a Phase I/II Clinical  
498 Treatment Trial. *Retina.* 2019;39(3):502-513.
- 499 41. Dubra A, Sulai Y. Reflective afocal broadband adaptive optics scanning ophthalmoscope.  
500 *Biomed Opt Express.* 2011;2(6):1757-1768.
- 501 42. Scoles D, Sulai YN, Langlo CS, et al. In vivo imaging of human cone photoreceptor  
502 inner segments. *Invest Ophthalmol Vis Sci.* 2014;55(7):4244-4251.
- 503 43. Salmon AE, Cooper RF, Langlo CS, Baghaie A, Dubra A, Carroll J. An Automated  
504 Reference Frame Selection (ARFS) Algorithm for Cone Imaging with Adaptive Optics  
505 Scanning Light Ophthalmoscopy. *Transl Vis Sci Technol.* 2017;6(2):9.
- 506 44. Dubra A, Harvey Z. Registration of 2D Images from Fast Scanning Ophthalmic  
507 Instruments. *Lecture Notes in Computer Science.* 2010;6204:60-71.
- 508 45. Bedggood P, Metha A. De-warping of images and improved eye tracking for the  
509 scanning laser ophthalmoscope. *PLoS One.* 2017;12(4):e0174617.
- 510 46. Chen M, Cooper RF, Han GK, Gee J, Brainard DH, Morgan JI. Multi-modal automatic  
511 montaging of adaptive optics retinal images. *Biomed Opt Express.* 2016;7(12):4899-  
512 4918.
- 513 47. Cooper RF, Wilk MA, Tarima S, Carroll J. Evaluating Descriptive Metrics of the Human  
514 Cone Mosaic. *Invest Ophthalmol Vis Sci.* 2016;57(7):2992-3001.
- 515 48. Ochakovski GA, Bartz-Schmidt KU, Fischer MD. Retinal Gene Therapy: Surgical Vector  
516 Delivery in the Translation to Clinical Trials. *Front Neurosci.* 2017;11:174.



- 517 49. Ochakovski GA, Peters T, Michalakis S, et al. Subretinal Injection for Gene Therapy  
518 Does Not Cause Clinically Significant Outer Nuclear Layer Thinning in Normal Primate  
519 Foveae. *Invest Ophthalmol Vis Sci.* 2017;58(10):4155-4160.
- 520 50. Reichel FF, Dauletbekov DL, Klein R, et al. AAV8 Can Induce Innate and Adaptive  
521 Immune Response in the Primate Eye. *Mol Ther.* 2017;25(12):2648-2660.
- 522 51. Weed L, Ammar MJ, Zhou S, et al. Safety of Same-Eye Subretinal Sequential  
523 Readministration of AAV2-hRPE65v2 in Non-human Primates. *Mol Ther Methods Clin  
524 Dev.* 2019;15:133-148.
- 525 52. Tobias P, Philipp SI, Stylianos M, et al. Safety and Toxicology of Ocular Gene Therapy  
526 with Recombinant AAV Vector rAAV.hCNGA3 in Nonhuman Primates. *Hum Gene Ther  
527 Clin Dev.* 2019;30(2):50-56.
- 528 53. Gill JS, Georgiou M, Kalitzeos A, Moore AT, Michaelides M. Progressive cone and  
529 cone-rod dystrophies: clinical features, molecular genetics and prospects for therapy. *Br J  
530 Ophthalmol.* 2019.
- 531 54. Song H, Rossi EA, Stone E, et al. Phenotypic diversity in autosomal-dominant cone-rod  
532 dystrophy elucidated by adaptive optics retinal imaging. *Br J Ophthalmol.*  
533 2018;102(1):136-141.
- 534 55. Xue K, Groppe M, Salvetti AP, MacLaren RE. Technique of retinal gene therapy:  
535 delivery of viral vector into the subretinal space. *Eye (Lond).* 2017;31(9):1308-1316.
- 536 56. Fischer MD, Hickey DG, Singh MS, MacLaren RE. Evaluation of an Optimized Injection  
537 System for Retinal Gene Therapy in Human Patients. *Hum Gene Ther Methods.*  
538 2016;27(4):150-158.
- 539 57. Smith AJ, Telander DG, Zawadzki RJ, et al. High-resolution Fourier-domain optical  
540 coherence tomography and micropertimetric findings after macula-off retinal detachment  
541 repair. *Ophthalmology.* 2008;115(11):1923-1929.
- 542 58. Rashid S, Pilli S, Chin EK, Zawadzki RJ, Werner JS, Park SS. Five-year follow-up of  
543 macular morphologic changes after rhegmatogenous retinal detachment repair: Fourier  
544 domain OCT findings. *Retina.* 2013;33(10):2049-2058.
- 545 59. Matlach J, Pflugger B, Hain J, Gobel W. Inner and outer central retinal findings after  
546 surgery for rhegmatogenous retinal detachment using different spectral-domain optical  
547 coherence tomography devices. *Graefes Arch Clin Exp Ophthalmol.* 2015;253(3):369-  
548 380.
- 549 60. Chang CJ, Lai WW, Edward DP, Tso MO. Apoptotic photoreceptor cell death after  
550 traumatic retinal detachment in humans. *Arch Ophthalmol.* 1995;113(7):880-886.
- 551 61. Lewis GP, Charteris DG, Sethi CS, Leitner WP, Linberg KA, Fisher SK. The ability of  
552 rapid retinal reattachment to stop or reverse the cellular and molecular events initiated by  
553 detachment. *Invest Ophthalmol Vis Sci.* 2002;43(7):2412-2420.
- 554 62. Luna G, Keeley PW, Reese BE, Linberg KA, Lewis GP, Fisher SK. Astrocyte structural  
555 reactivity and plasticity in models of retinal detachment. *Exp Eye Res.* 2016;150:4-21.
- 556 63. Cook B, Lewis GP, Fisher SK, Adler R. Apoptotic photoreceptor degeneration in  
557 experimental retinal detachment. *Invest Ophthalmol Vis Sci.* 1995;36(6):990-996.
- 558 64. Cooper RF, Tuten WS, Dubra A, Brainard DH, Morgan JIW. Non-invasive assessment of  
559 human cone photoreceptor function. *Biomed Opt Express.* 2017;8(11):5098-5112.
- 560 65. Cooper RF, Brainard DH, Morgan JIW. Optoretinography of individual human cone  
561 photoreceptors. *Opt Express.* 2020;28(26):39326-39339.



- 562 66. Azimipour M, Migacz JV, Zawadzki RJ, Werner JS, Jonnal RS. Functional retinal  
563 imaging using adaptive optics swept-source OCT at 1.6 MHz. *Optica*. 2019;6(3):300-  
564 303.
- 565 67. Azimipour M, Valente D, Vienola KV, Werner JS, Zawadzki RJ, Jonnal RS.  
566 Optoretinogram: optical measurement of human cone and rod photoreceptor responses to  
567 light. *Opt Lett*. 2020;45(17):4658-4661.
- 568 68. Pandiyan VP, Jiang X, Maloney-Bertelli A, Kuchenbecker JA, Sharma U, Sabesan R.  
569 High-speed adaptive optics line-scan OCT for cellular-resolution optoretinography.  
570 *Biomed Opt Express*. 2020;11(9):5274-5296.
- 571 69. Tuten WS, Tiruveedhula P, Roorda A. Adaptive optics scanning laser ophthalmoscope-  
572 based microperimetry. *Optom Vis Sci*. 2012;89(5):563-574.
- 573 70. Harmening WM, Tuten WS, Roorda A, Sincich LC. Mapping the perceptual grain of the  
574 human retina. *J Neurosci*. 2014;34(16):5667-5677.
- 575 71. Wang Q, Tuten WS, Lujan BJ, et al. Adaptive optics microperimetry and OCT images  
576 show preserved function and recovery of cone visibility in macular telangiectasia type 2  
577 retinal lesions. *Invest Ophthalmol Vis Sci*. 2015;56(2):778-786.
- 578 72. Morgan JIW, Chen M, Huang AM, Jiang YY, Cooper RF. Cone Identification in  
579 Choroideremia: Repeatability, Reliability, and Automation Through Use of a  
580 Convolutional Neural Network. *Transl Vis Sci Technol*. 2020;9(2):40.
- 581 73. Liang KY, Zeger, S.L. Longitudinal data analysis using generalized linear models.  
582 *Biometrika*. 1986;73:13-22.

583

1 **Supplemental material for Morgan et al. “Short-term assessment of subfoveal injection of**  
2 **AAV2-*hCHM* gene augmentation in choroideremia using adaptive optics ophthalmoscopy”**

3

4 **Supplemental Figure 1-8:** Nonconfocal split detection AOSLO montage of the photoreceptor  
5 inner segment mosaic at baseline and one-month post-injection in the injected (A) and uninjected  
6 (B) eyes of PN-01 (Supplemental Figure 1), PN-03 (Supplemental Figure 2), PN-04  
7 (Supplemental Figure 3), PN-05 (Supplemental Figure 4), PN-07 (Supplemental Figure 5),  
8 PN-08 (Supplemental Figure 6), PN-09 (Supplemental Figure 7), PN-11 (Supplemental  
9 Figure 8).

10

PN-01 Injected Eye

**A**

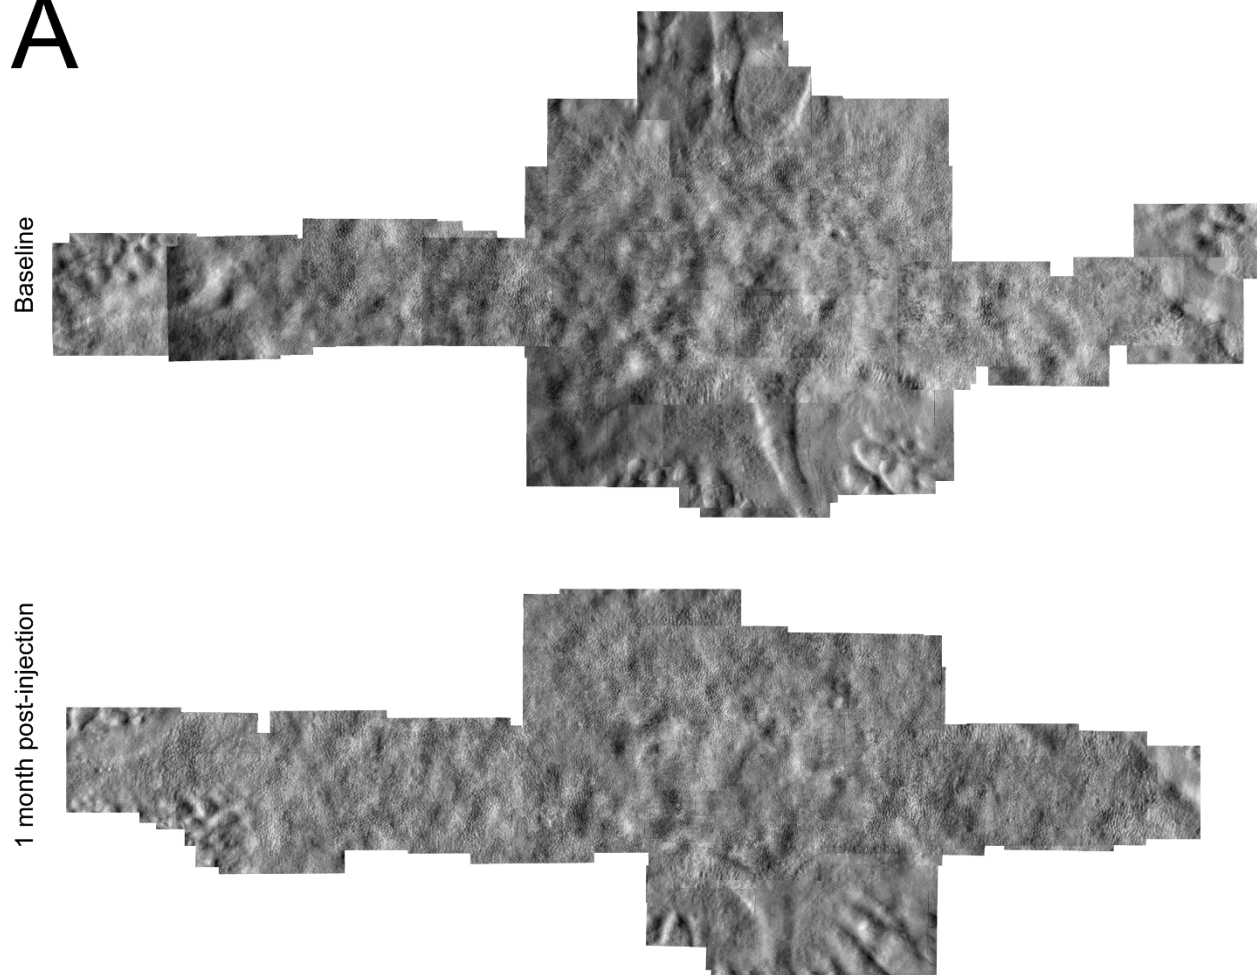

11

12 **Supplemental Figure 1A**

## PN-01 Uninjected Eye

# B

Baseline

1 month post-injection

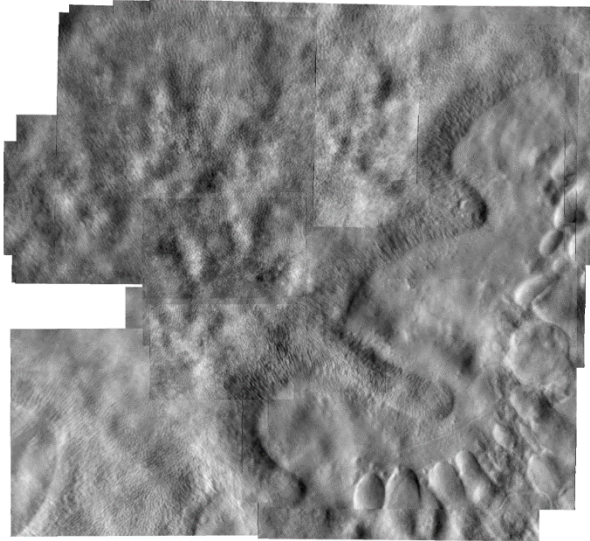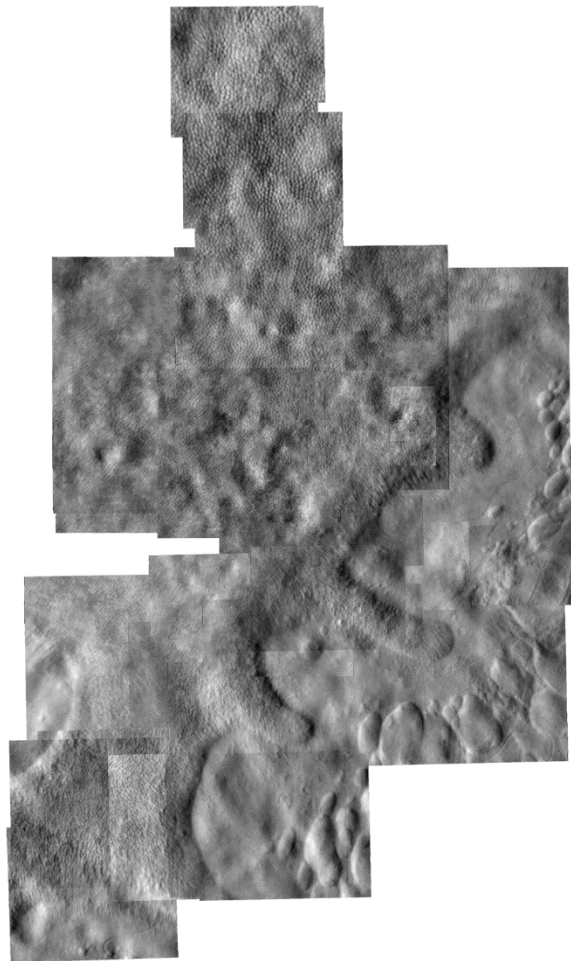

13

14 **Supplemental Figure 1B**

15

PN-03 Injected Eye

**A**

Baseline

1 month post-injection

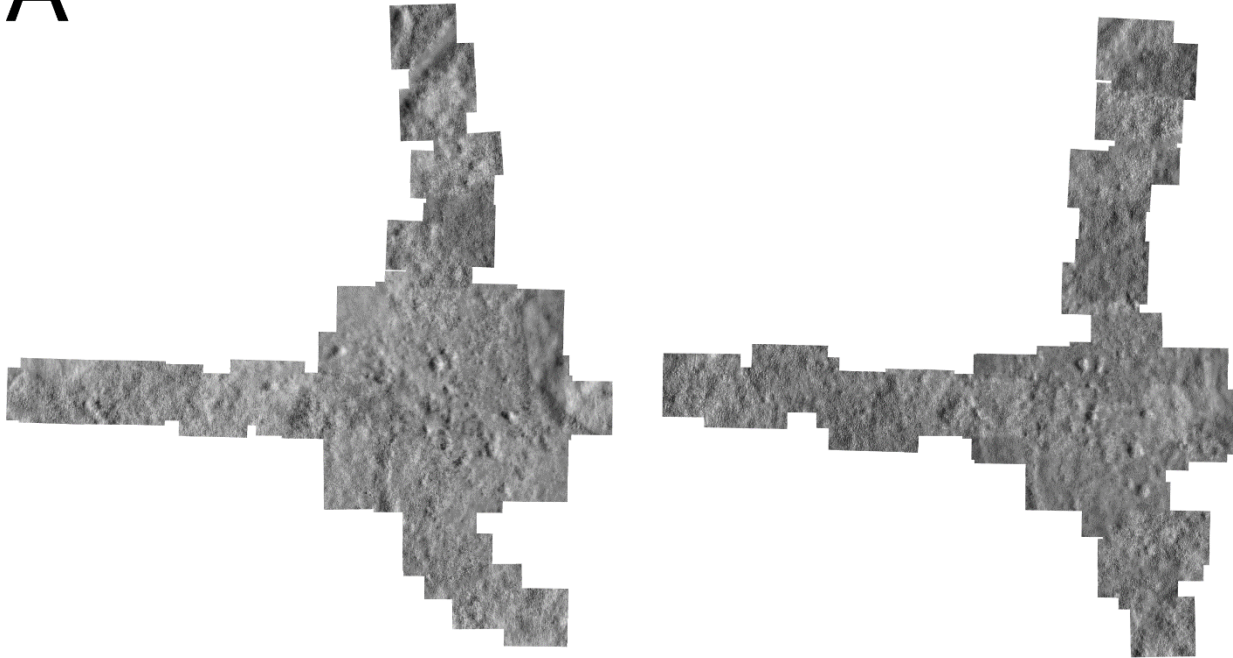

16

17 **Supplemental Figure 2A**

18

19

PN-03 Uninjected Eye

**B**

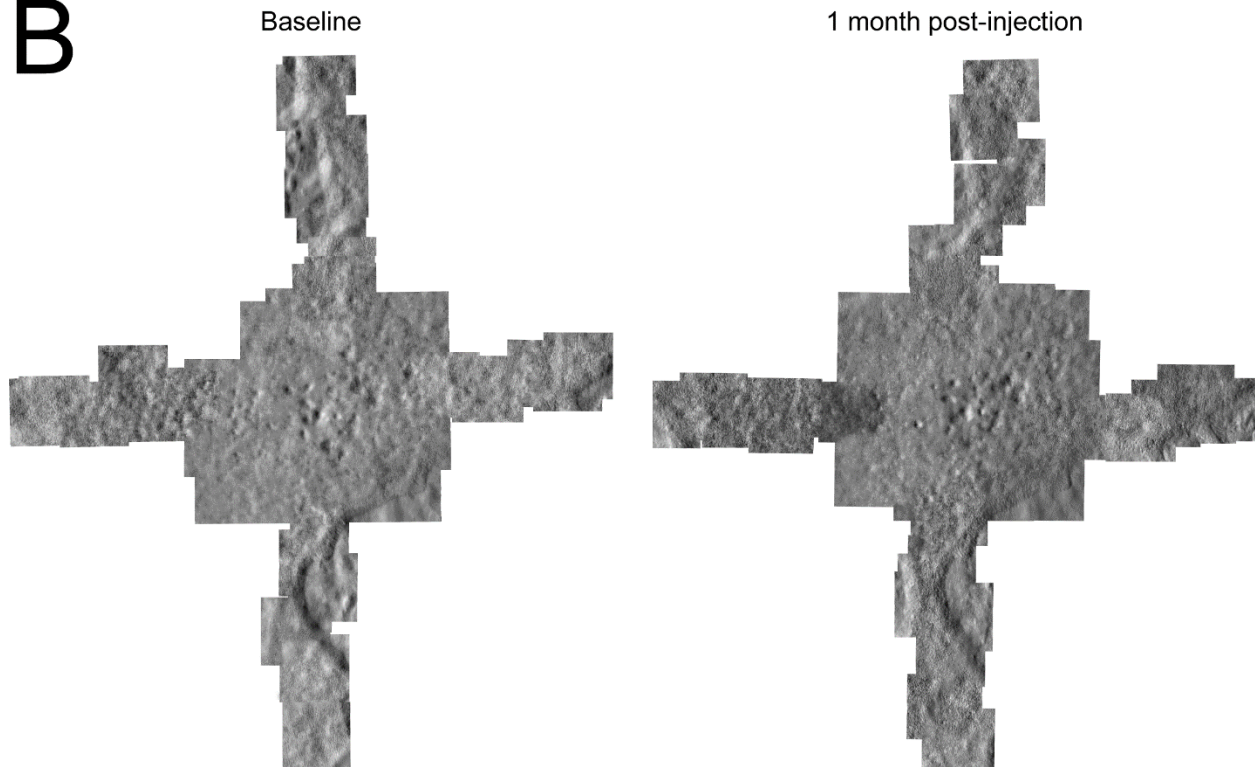

20

21 **Supplemental Figure 2B**



## PN-04 Injected Eye

# A

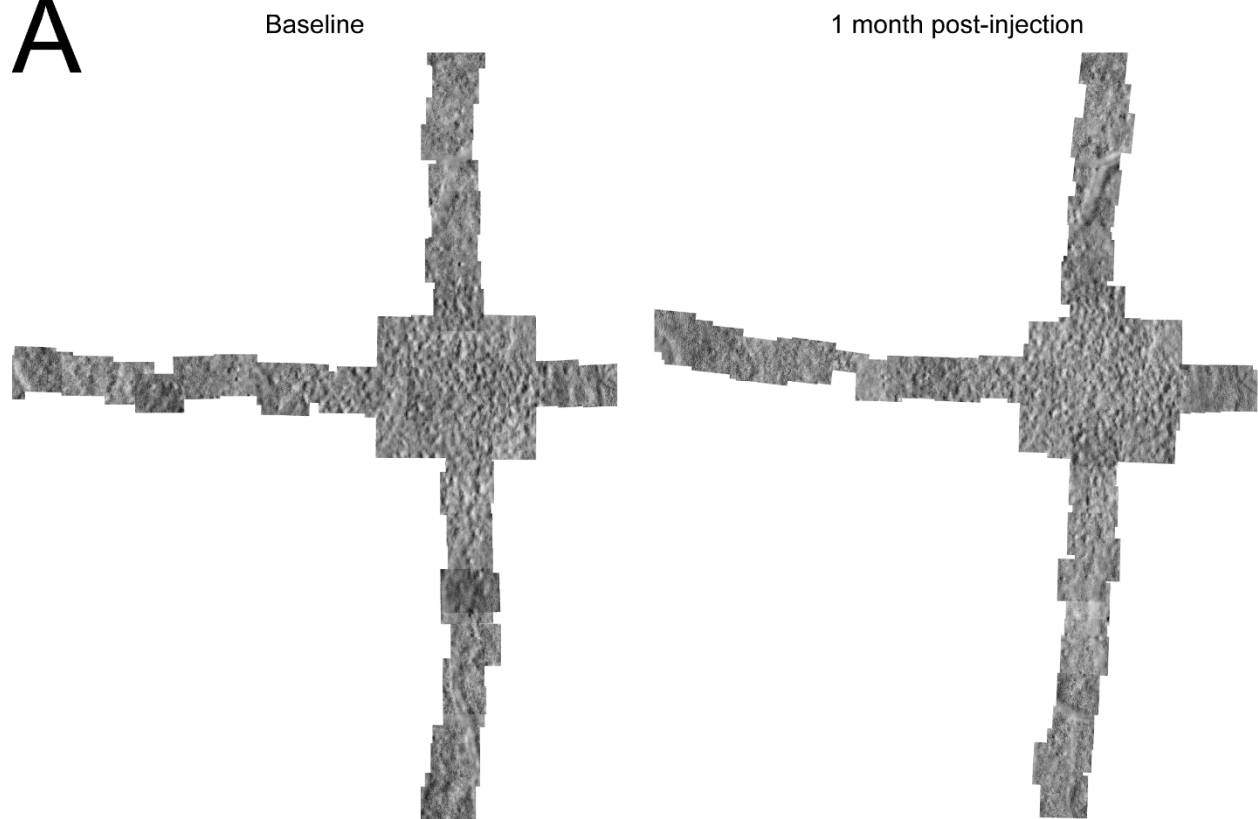

22

23 **Supplemental Figure 3A**

24

## PN-04 Uninjected Eye

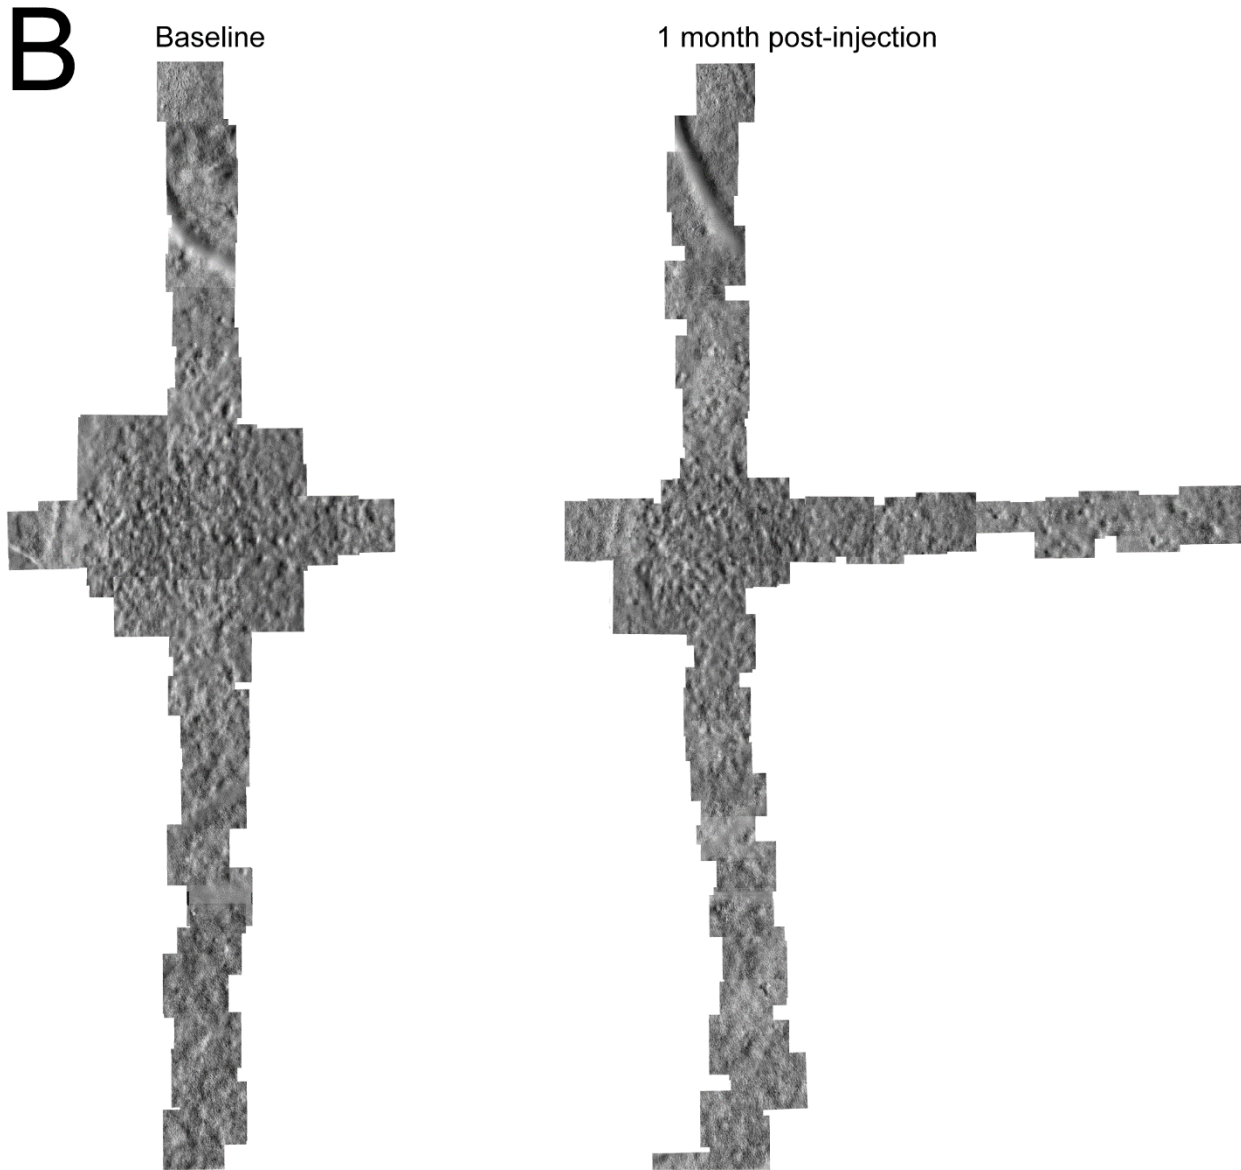

25

26 **Supplemental Figure 3B**

27

## PN-05 Injected Eye

# A

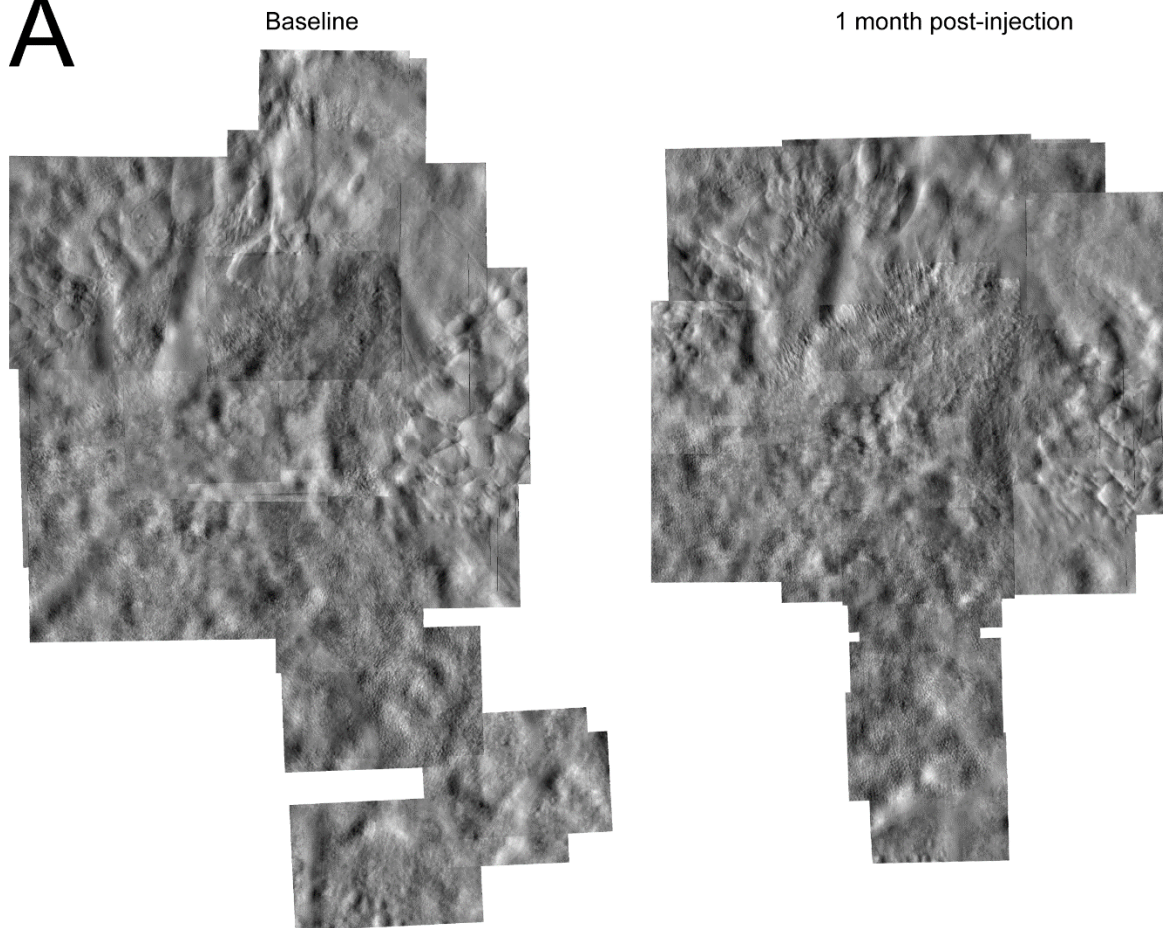

28

29 **Supplemental Figure 4A**

30

PN-05 Uninjected Eye

**B**

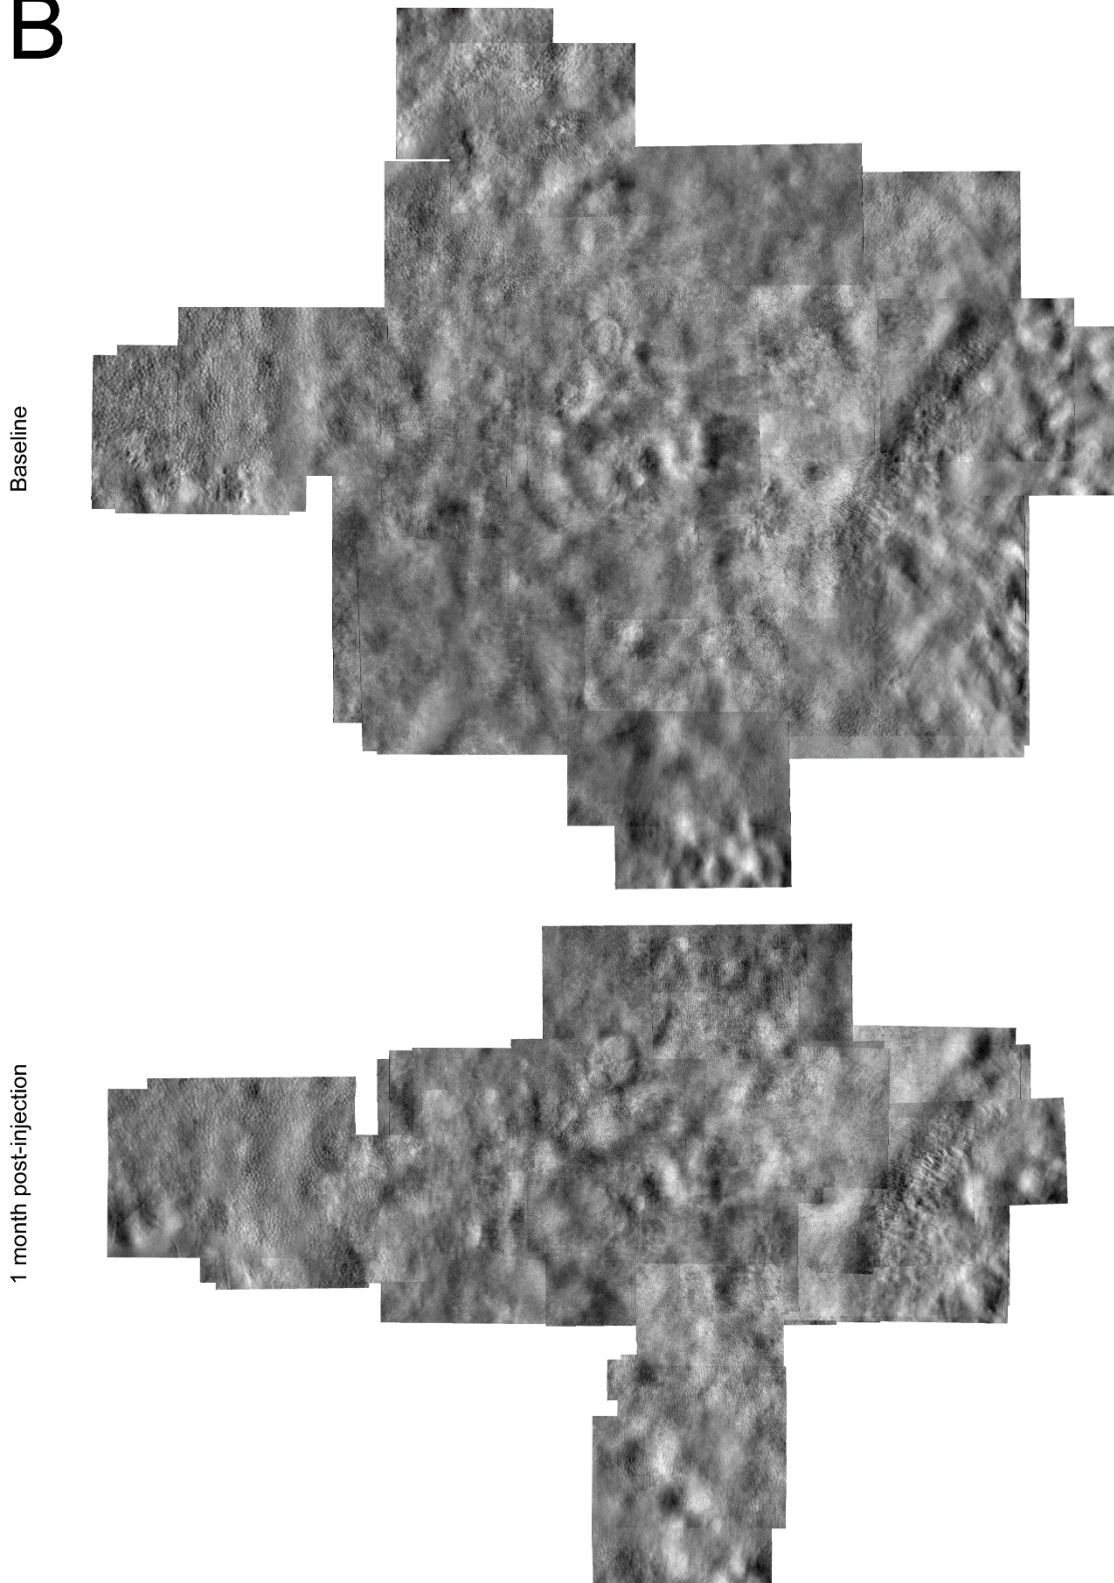

31

32 **Supplemental Figure 4B**



## PN-07 Injected Eye

# A

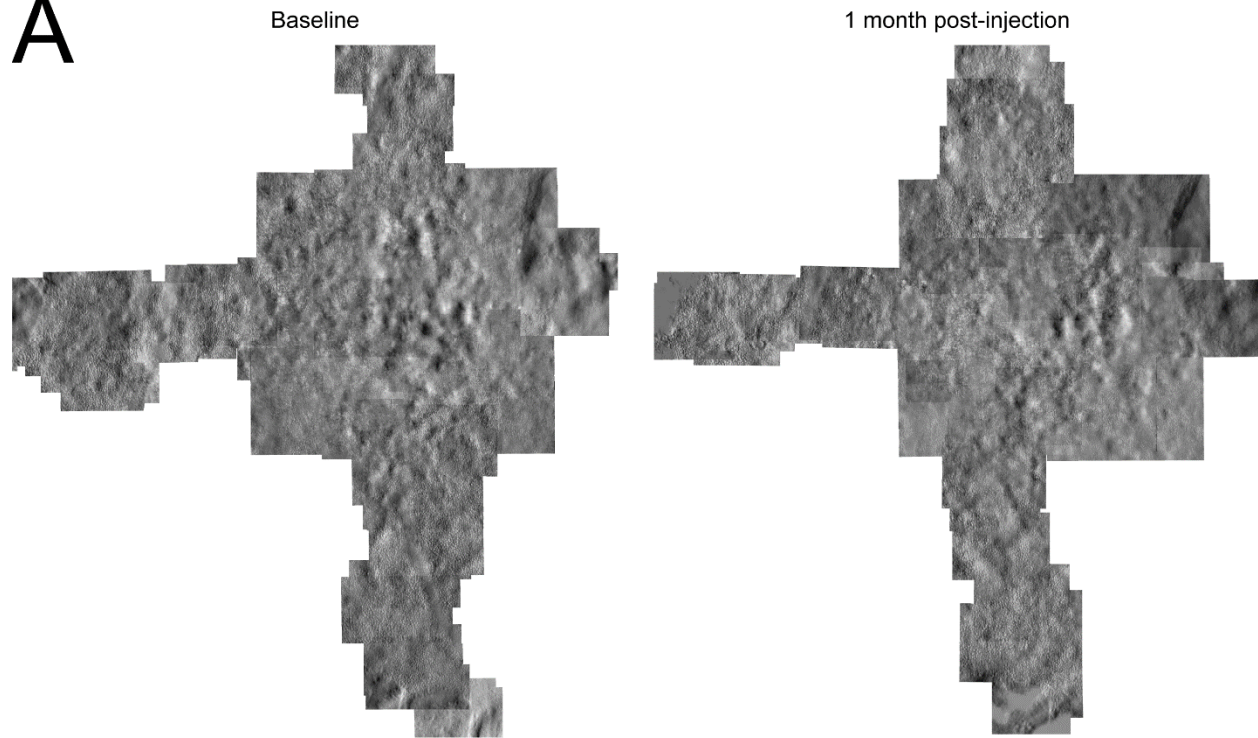

33

34 **Supplemental Figure 5A**

35

PN-07 Uninjected Eye

**B**

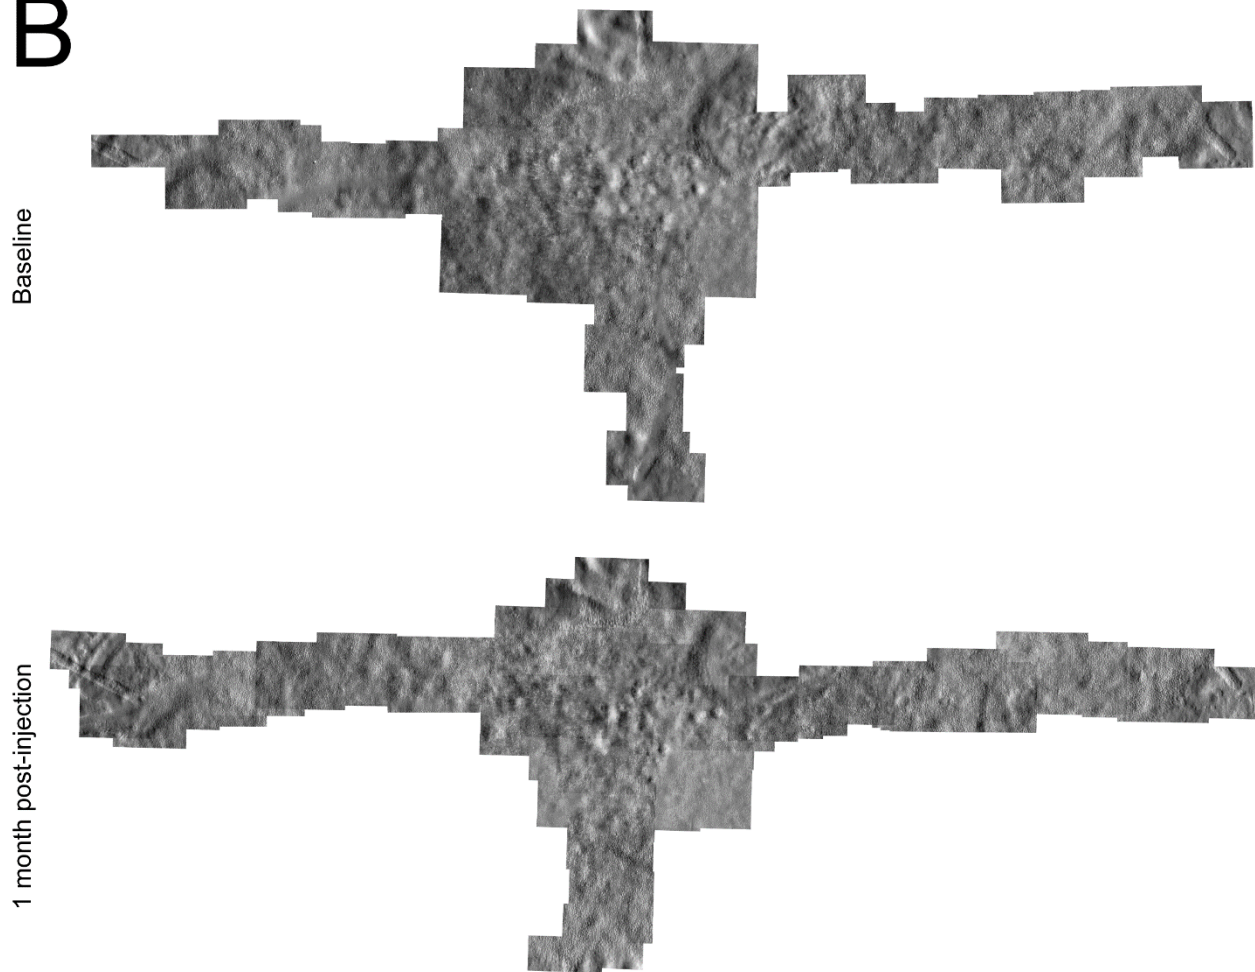

36

37 **Supplemental Figure 5B**

38

## PN-08 Injected Eye

# A

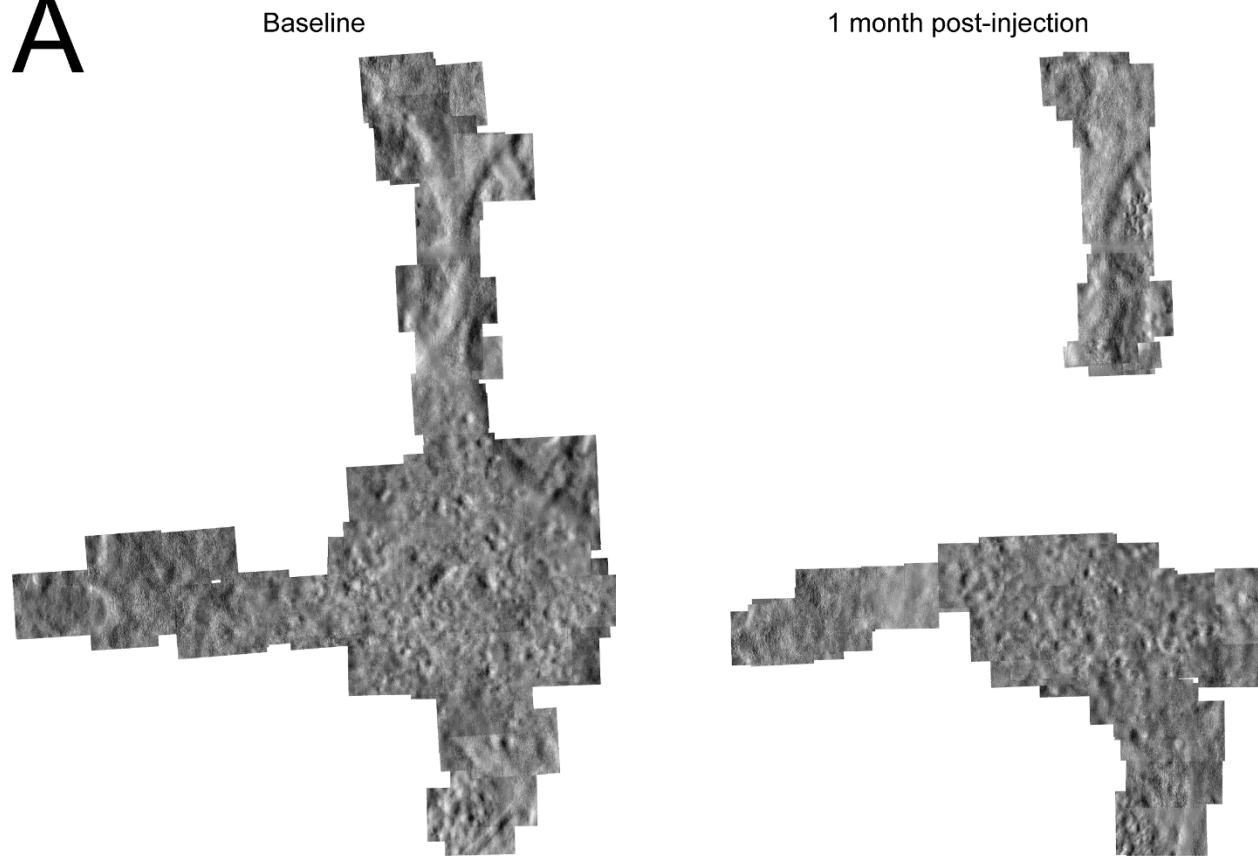

39

40 **Supplemental Figure 6A**

41

## PN-08 Uninjected Eye

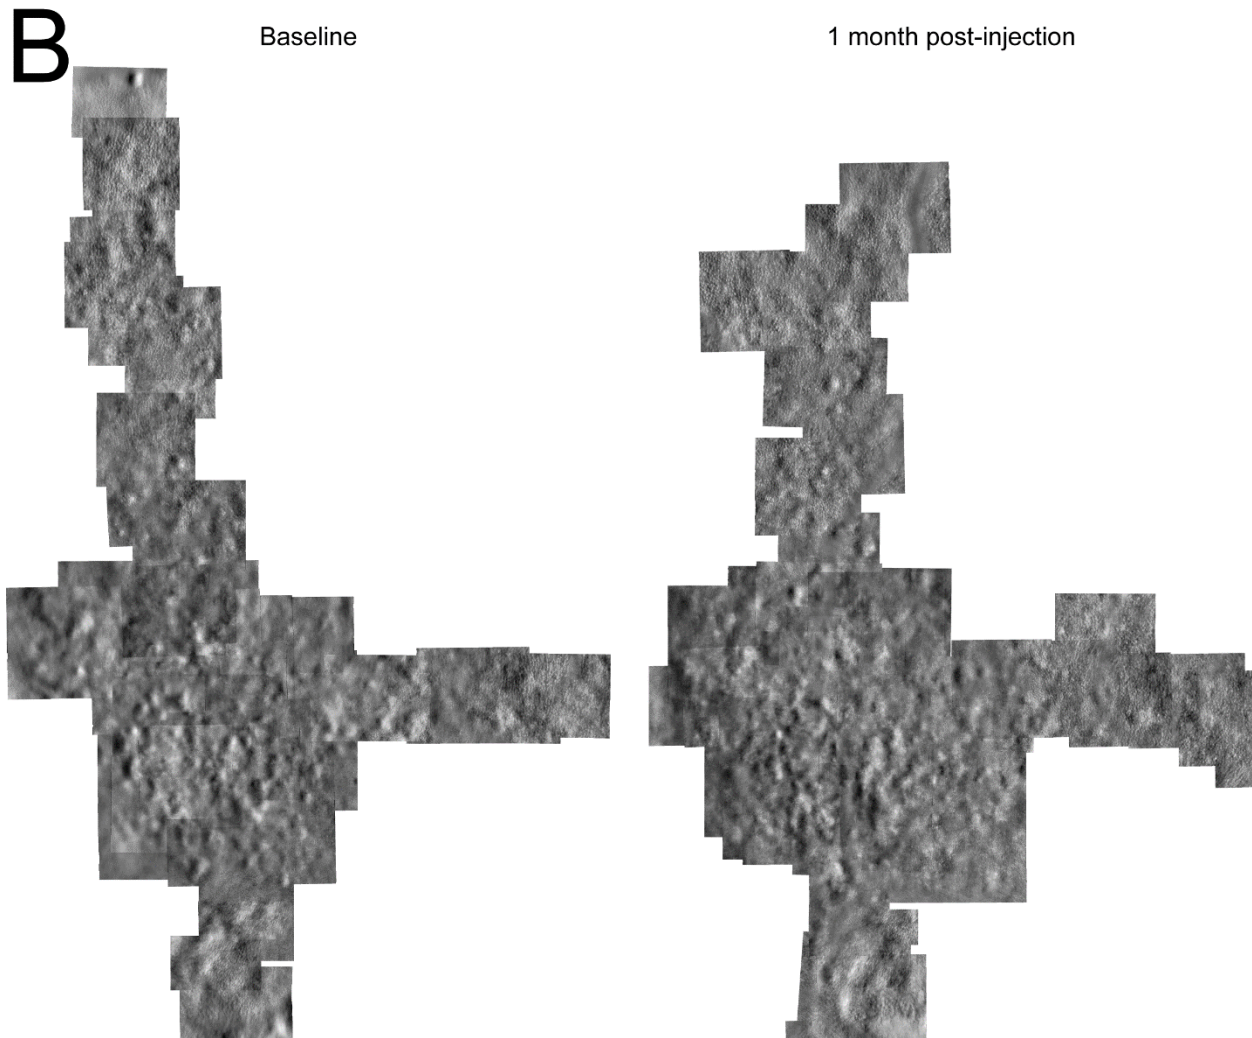

42

43 **Supplemental Figure 6B**

44



PN-09 Injected Eye

**A**

Baseline

1 month post-injection

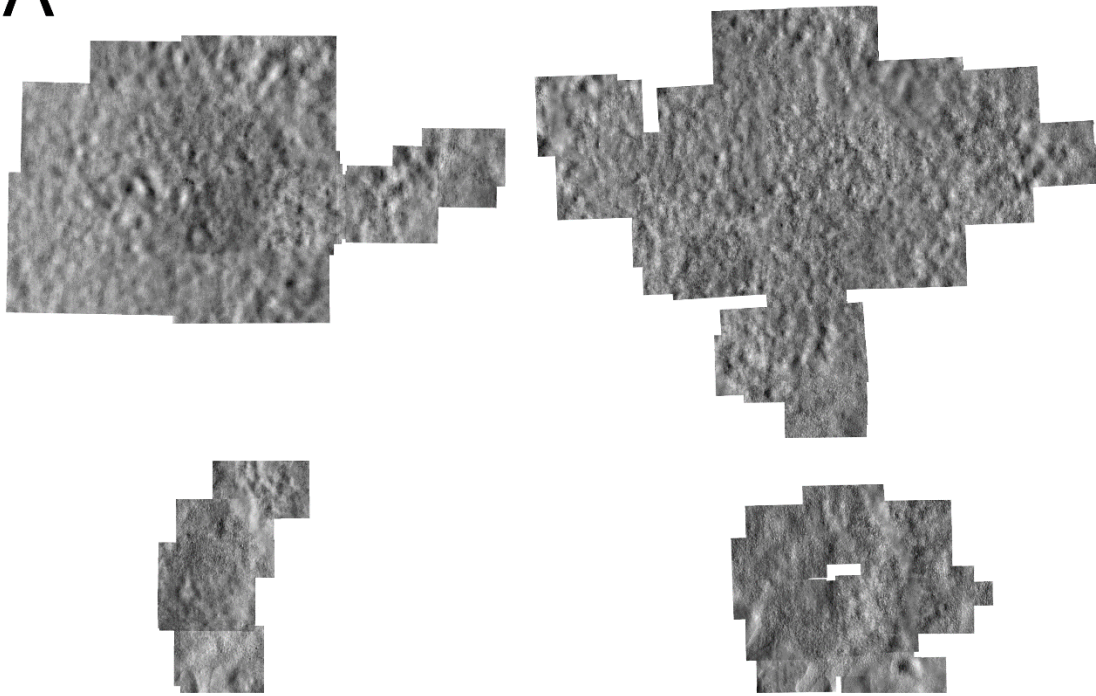

45

46 **Supplemental Figure 7A**

47

## PN-09 Uninjected Eye

# B

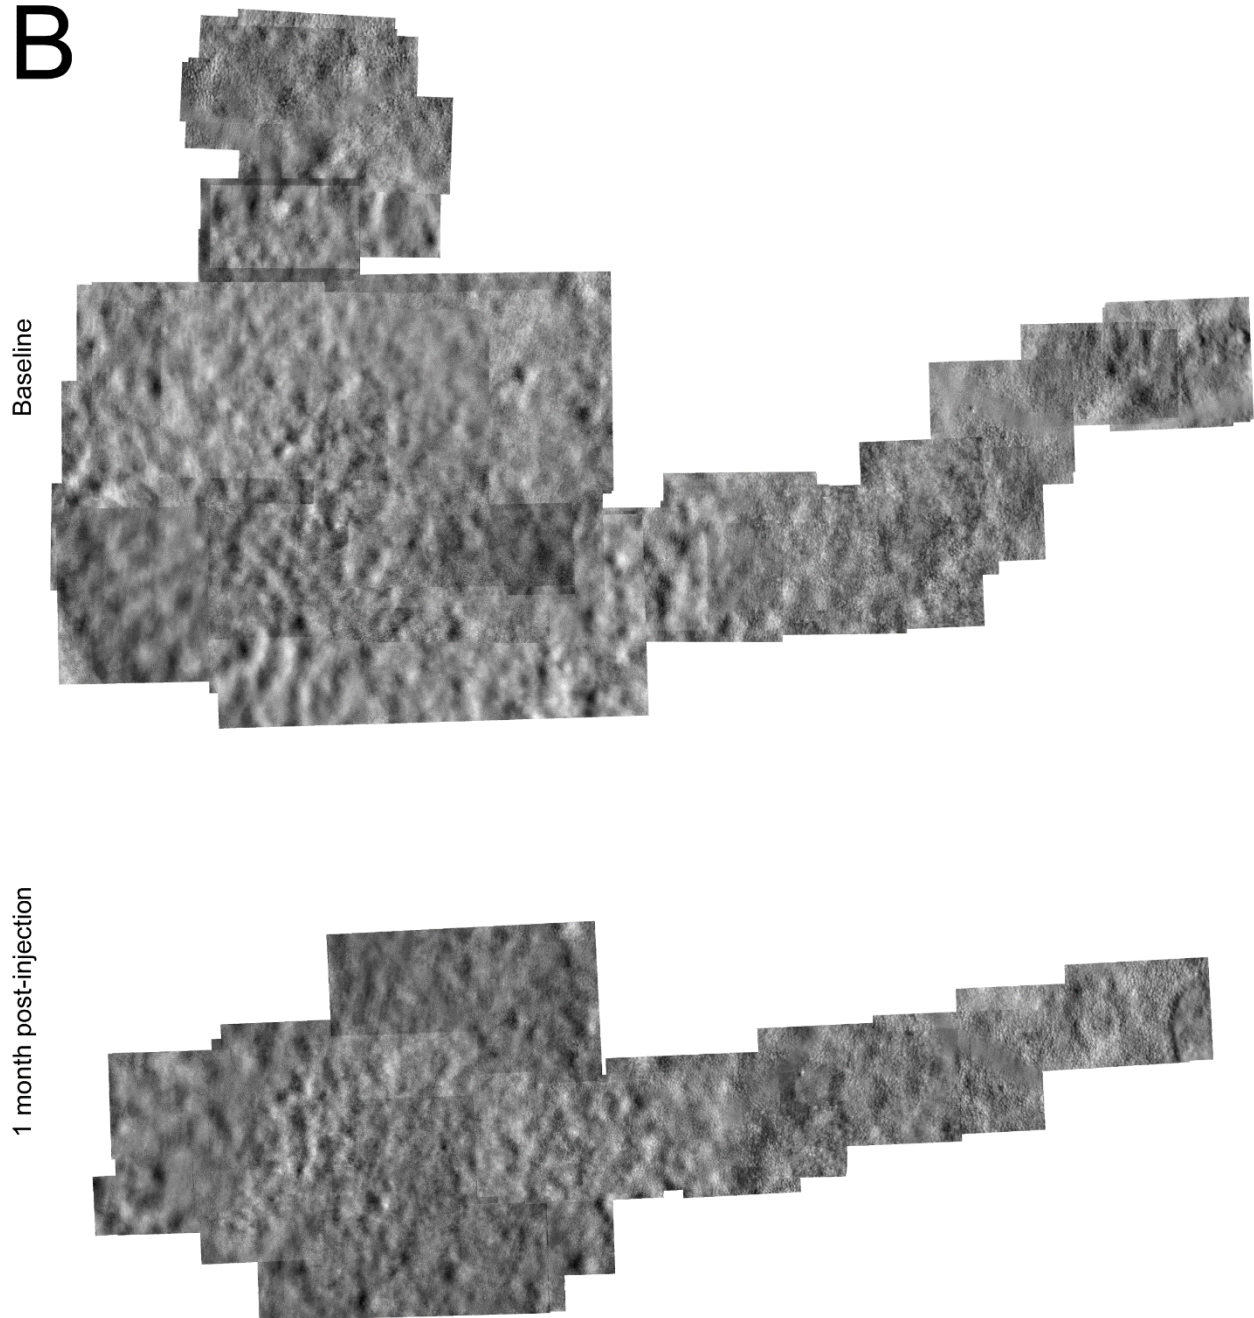

48

49 **Supplemental Figure 7B**

50

## PN-11 Injected Eye

# A

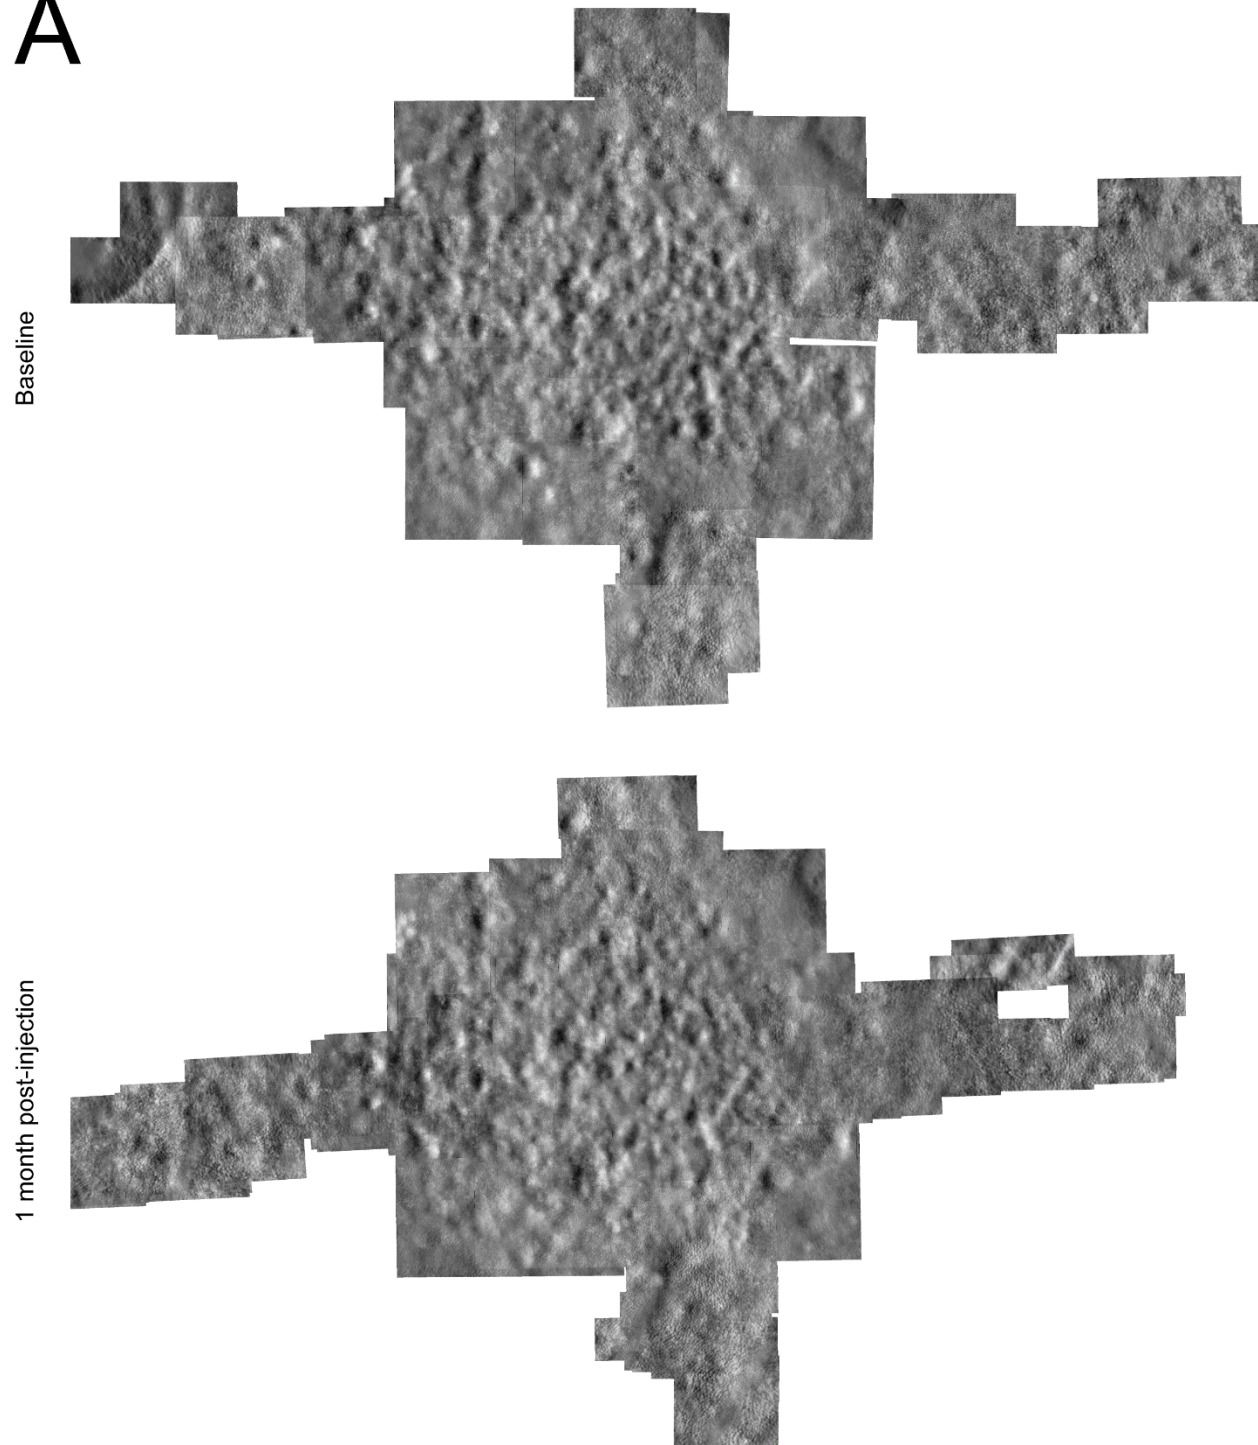

51

52

53 **Supplemental Figure 8A**

54

PN-11 Uninjected Eye

**B**

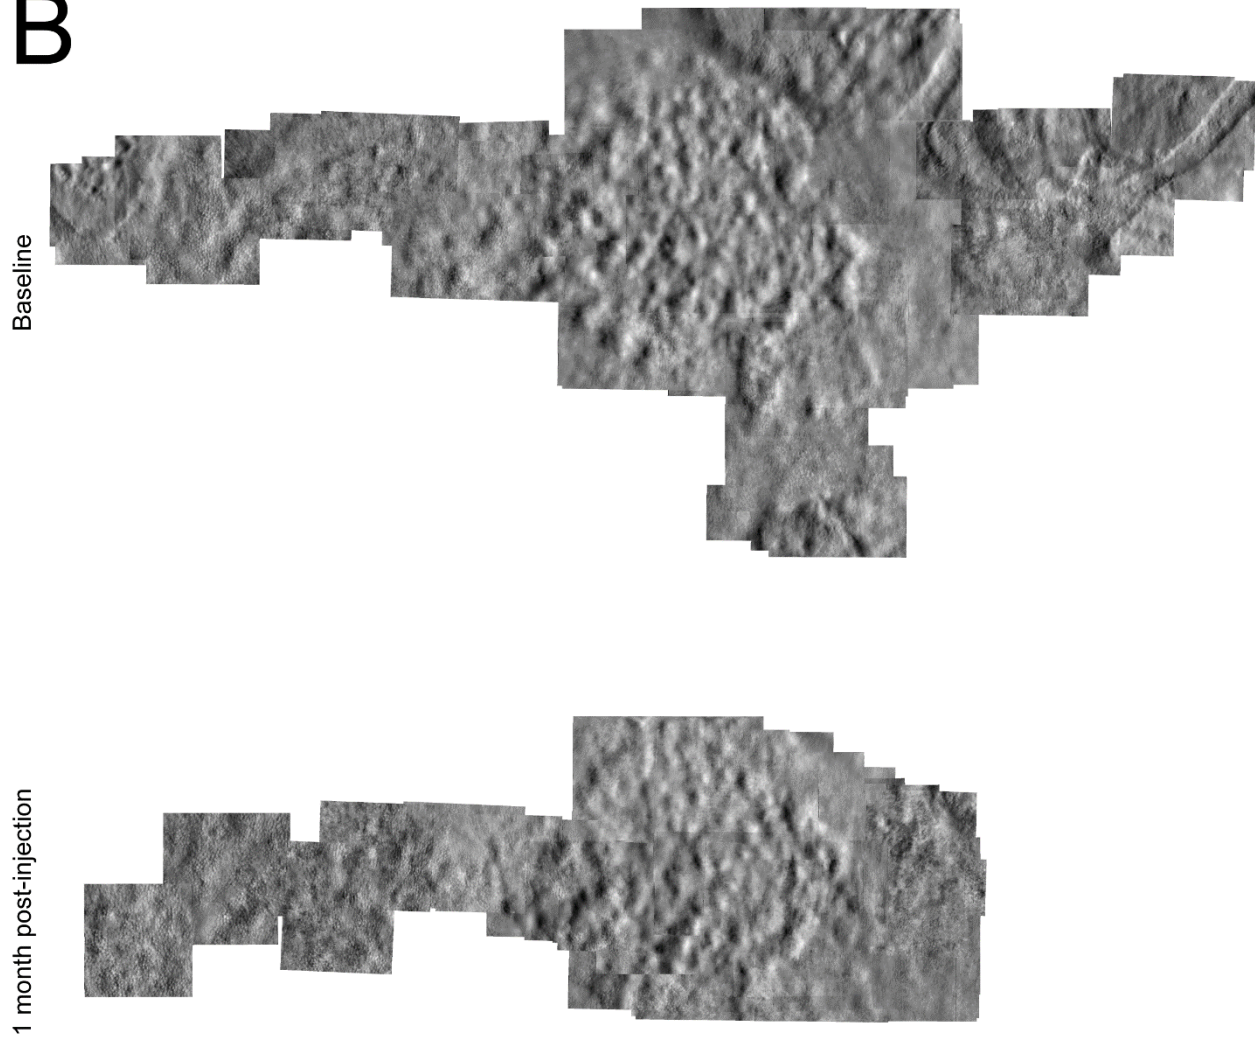

55

56 **Supplemental Figure 8B**

57

58

59

60

61

62

63



64 **Supplemental Figures 9-17:** All AO ROIs used for cone identification and cone density  
65 measurements in injected and uninjected eyes. **9:** PN-01 **10:** PN-03 **11:** PN-04 **12:** PN-05 **13:**  
66 PN-06 **14:** PN-07 **15:** PN-08 **16:** PN-09 **17:** PN-11 **Top row:** ROIs showing the cone mosaic at  
67 baseline in the injected eye. **Second row:** ROIs showing the cone mosaic at one-month post-  
68 injection in the injected eye aligned to the baseline ROIs. **Third row:** ROIs showing the cone  
69 mosaic at baseline in the uninjected eye. **Bottom row:** ROIs showing the cone mosaic at one-  
70 month post-injection in the uninjected eye aligned to the baseline ROIs.  
71

PN-01

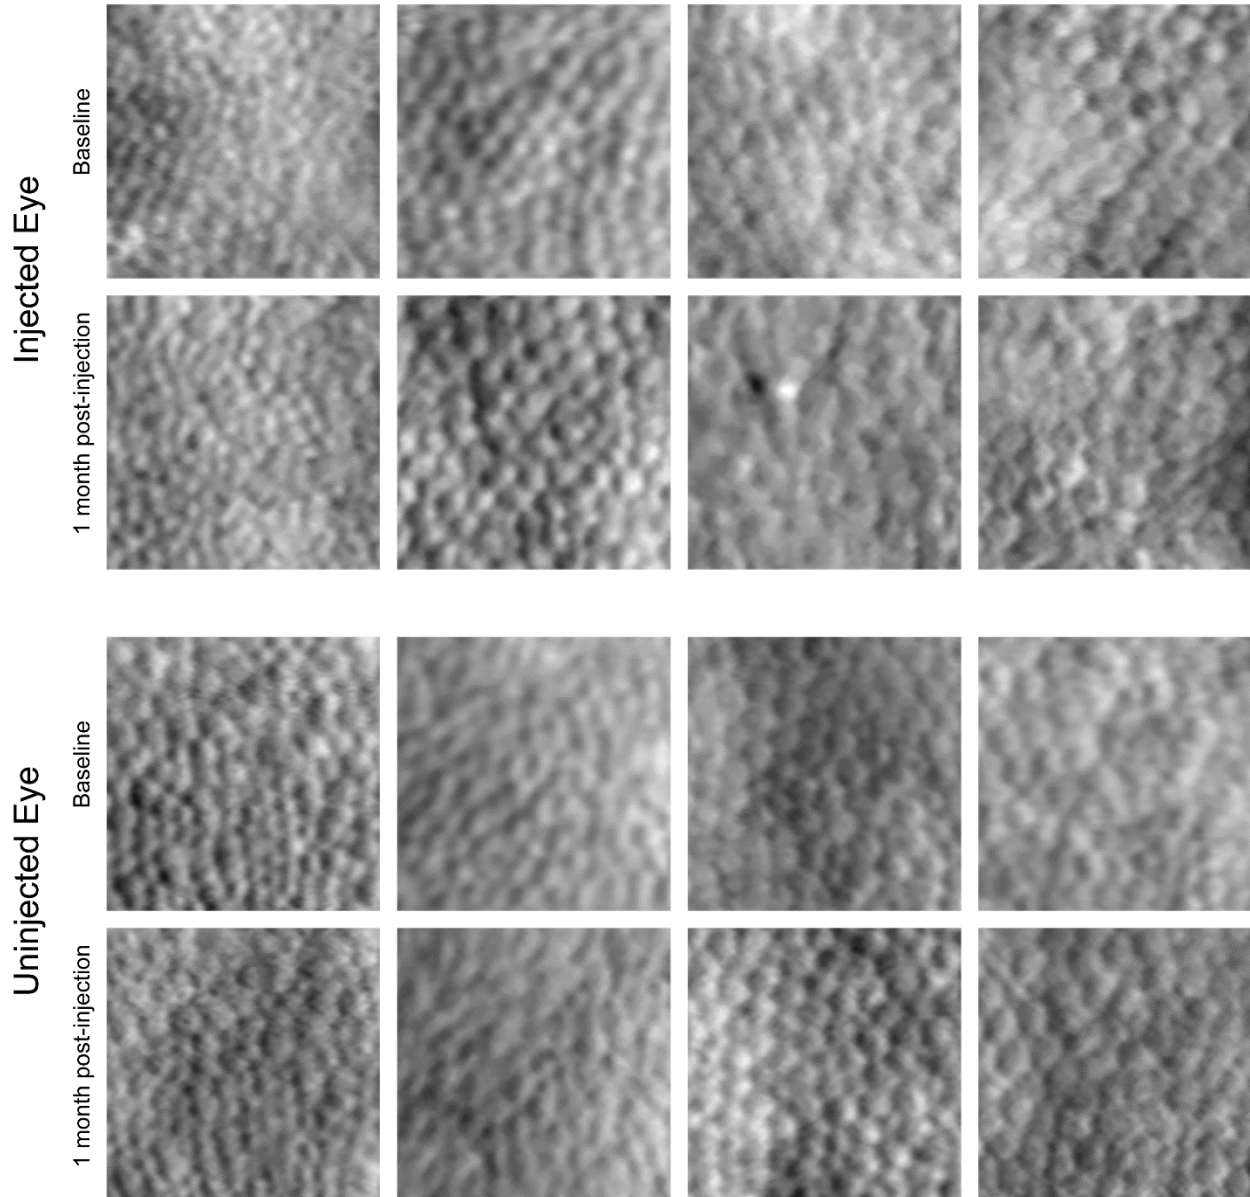

72

73 **Supplemental Figure 9**

74

PN-03

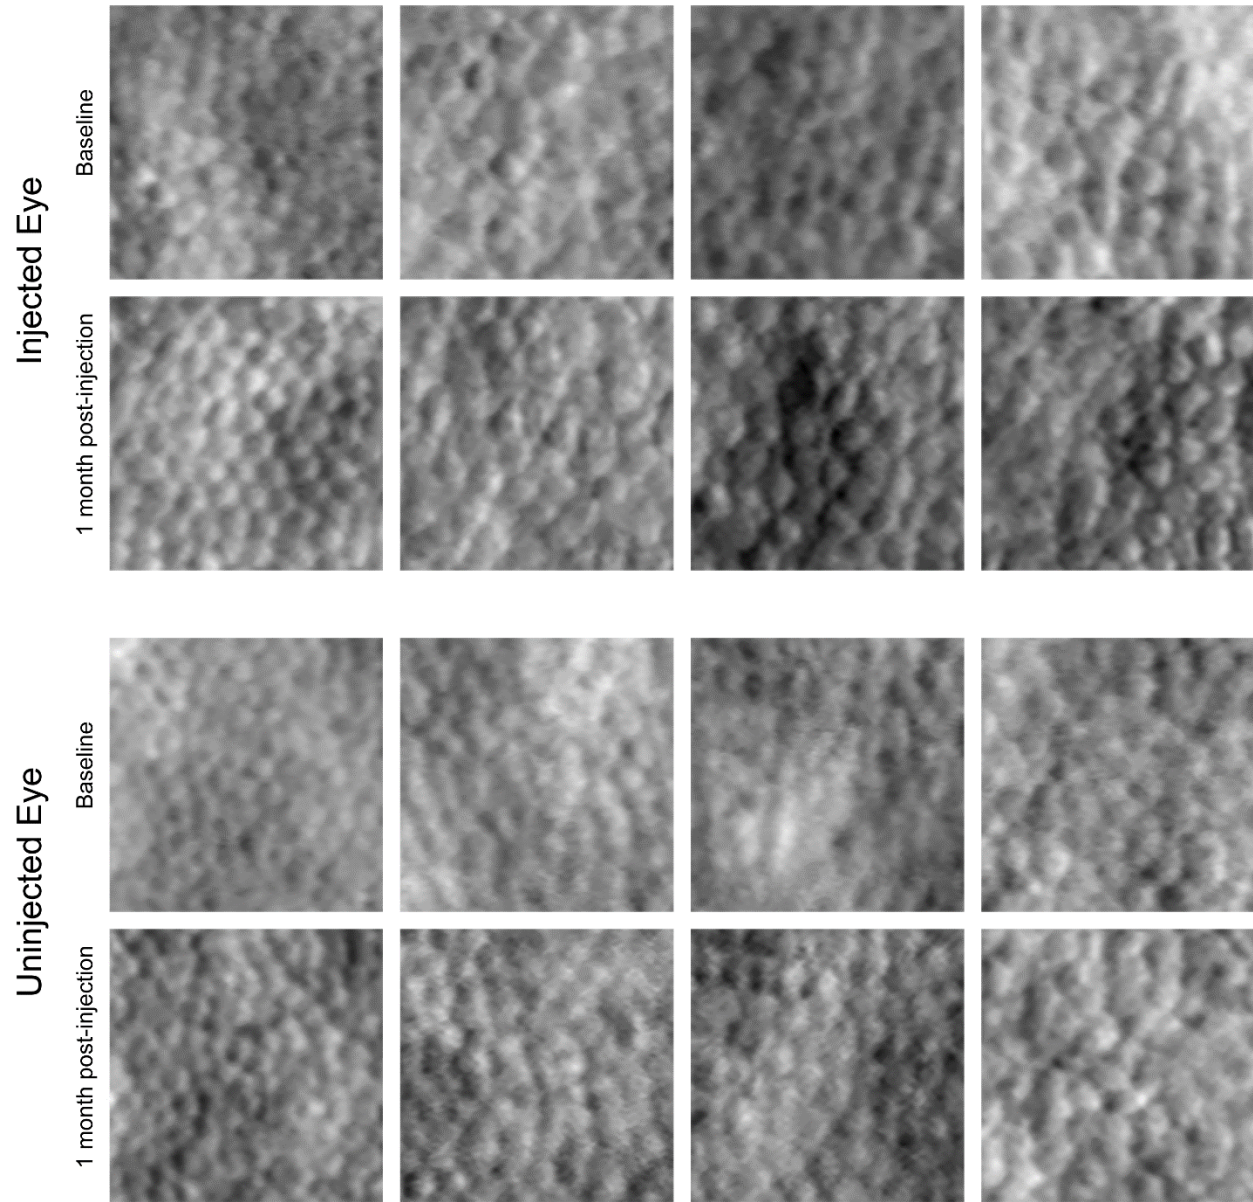

75

76 **Supplemental Figure 10**

77



PN-04

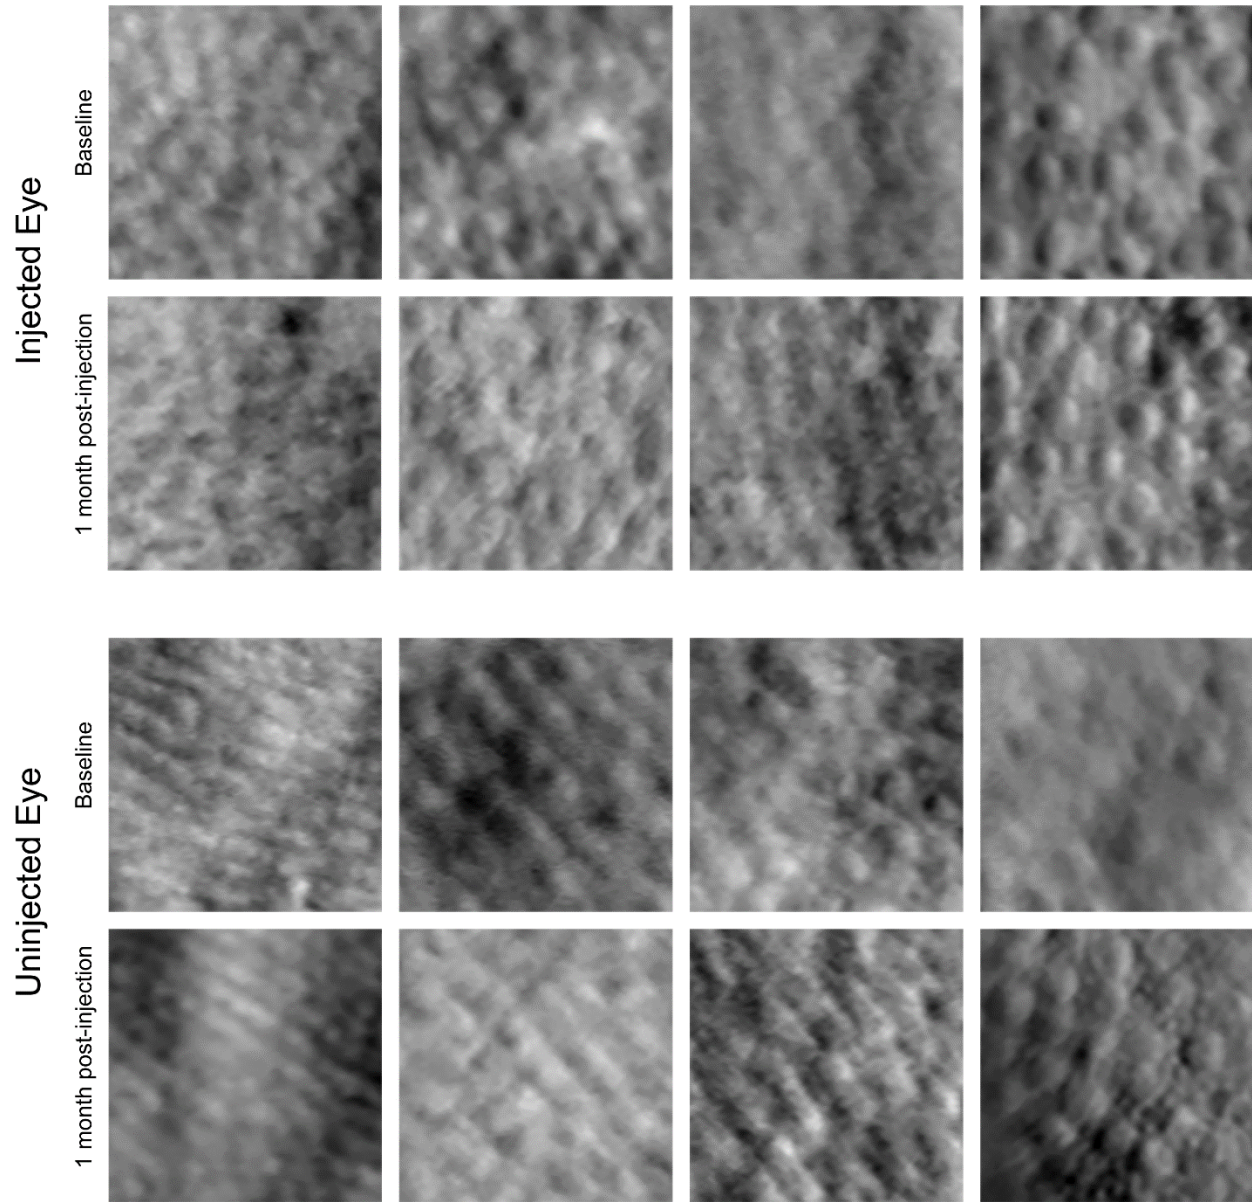

78

79 **Supplemental Figure 11**

80

PN-05

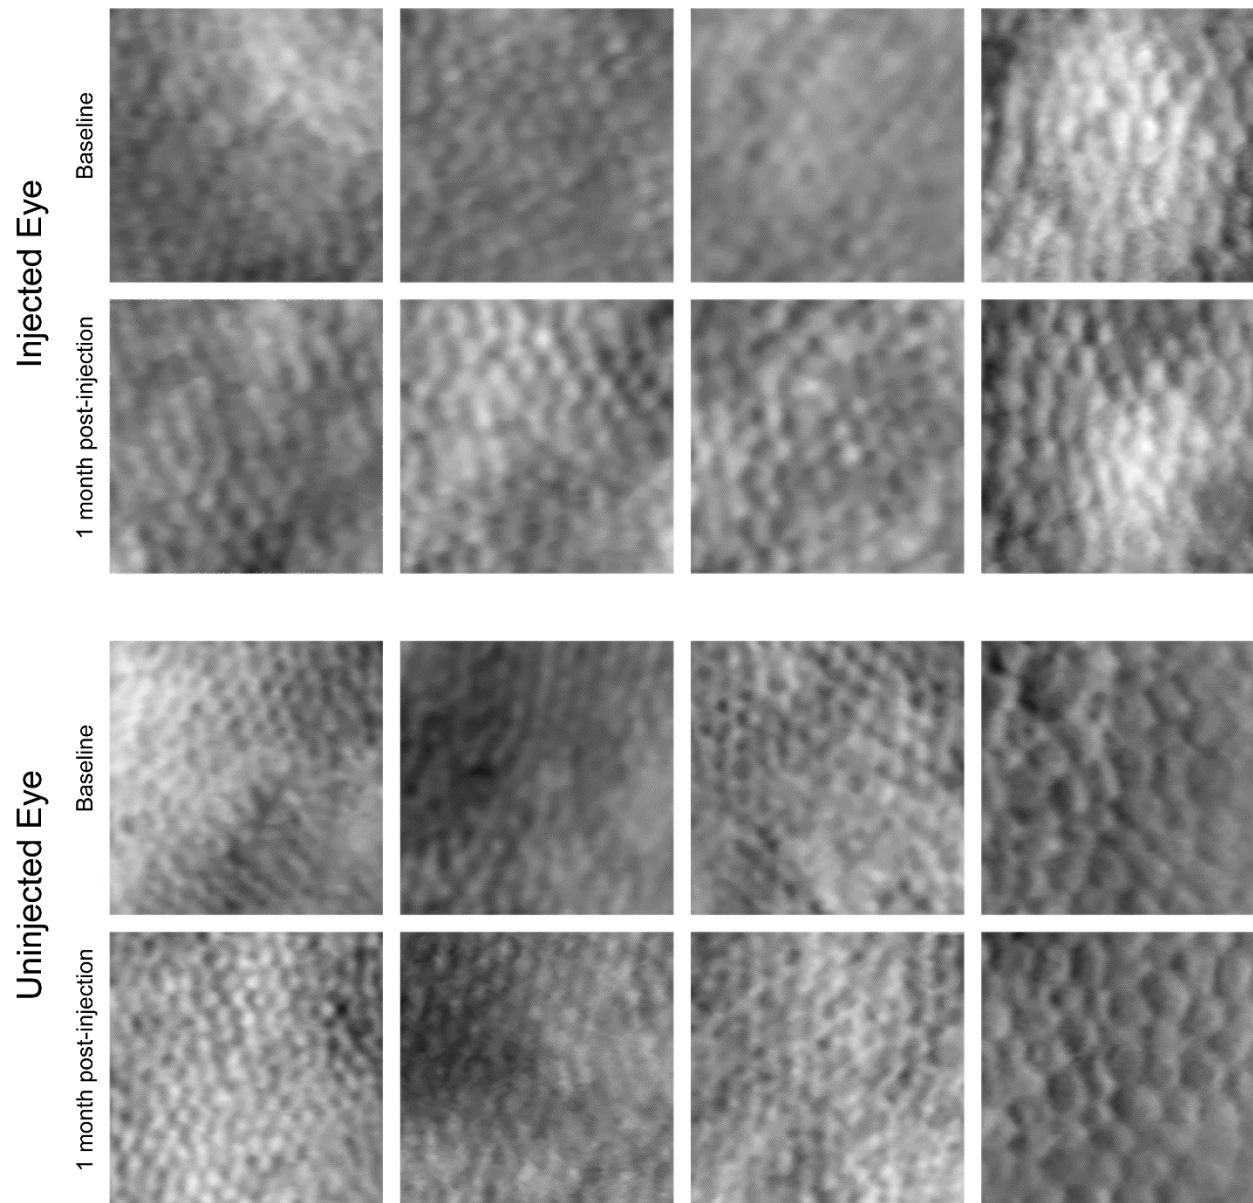

81

82 **Supplemental Figure 12**

83



PN-06

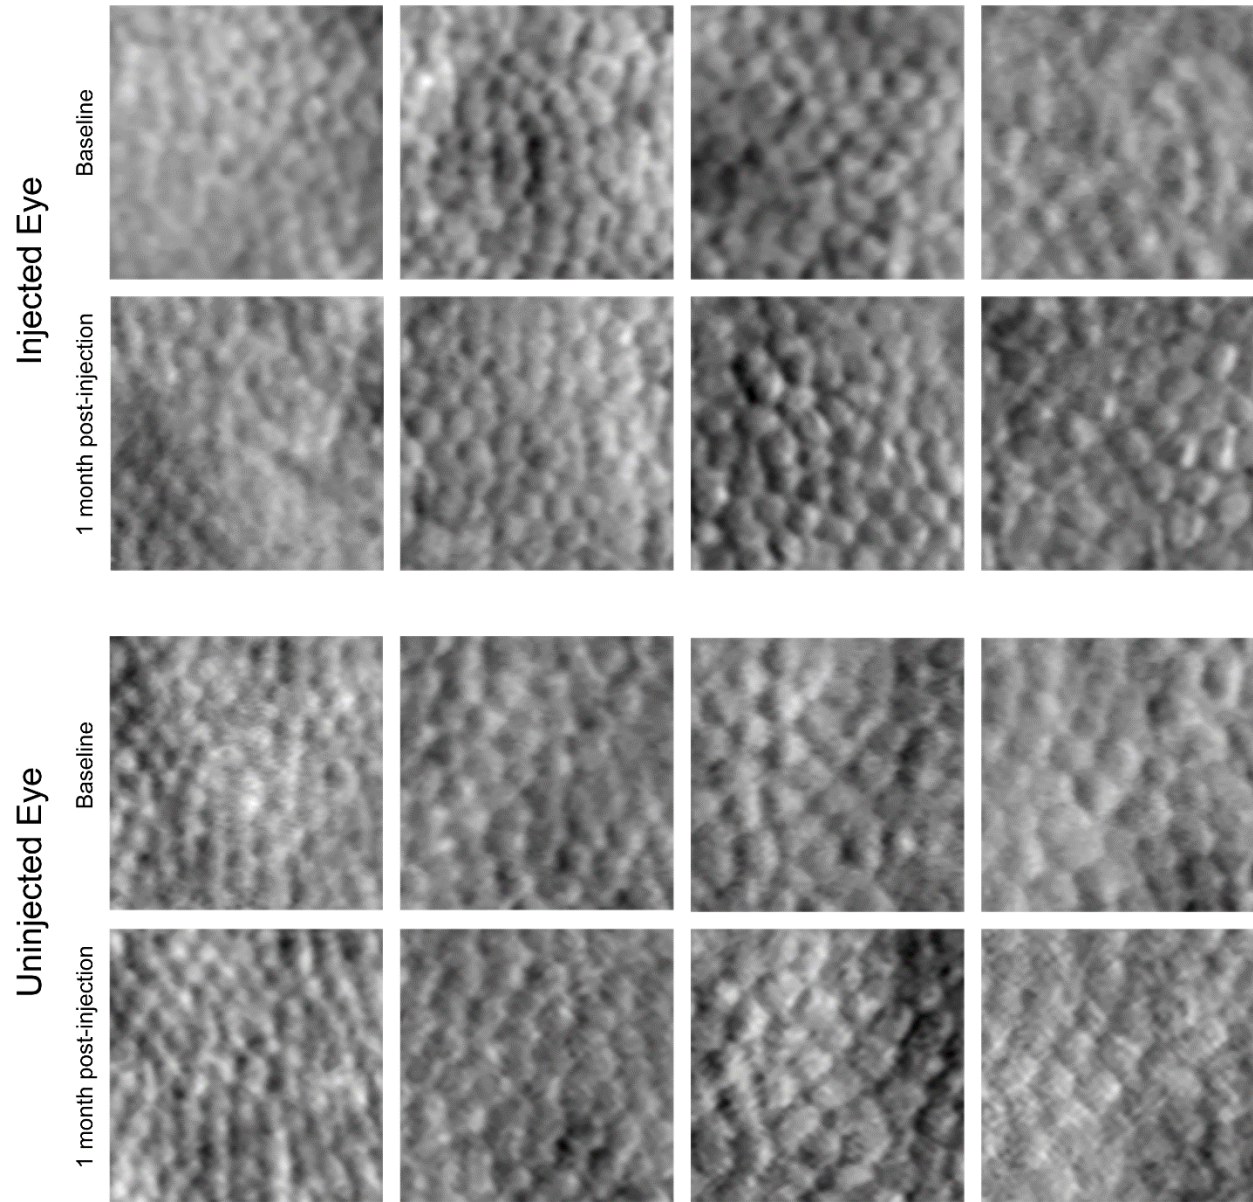

84

85 **Supplemental Figure 13**

86

PN-07

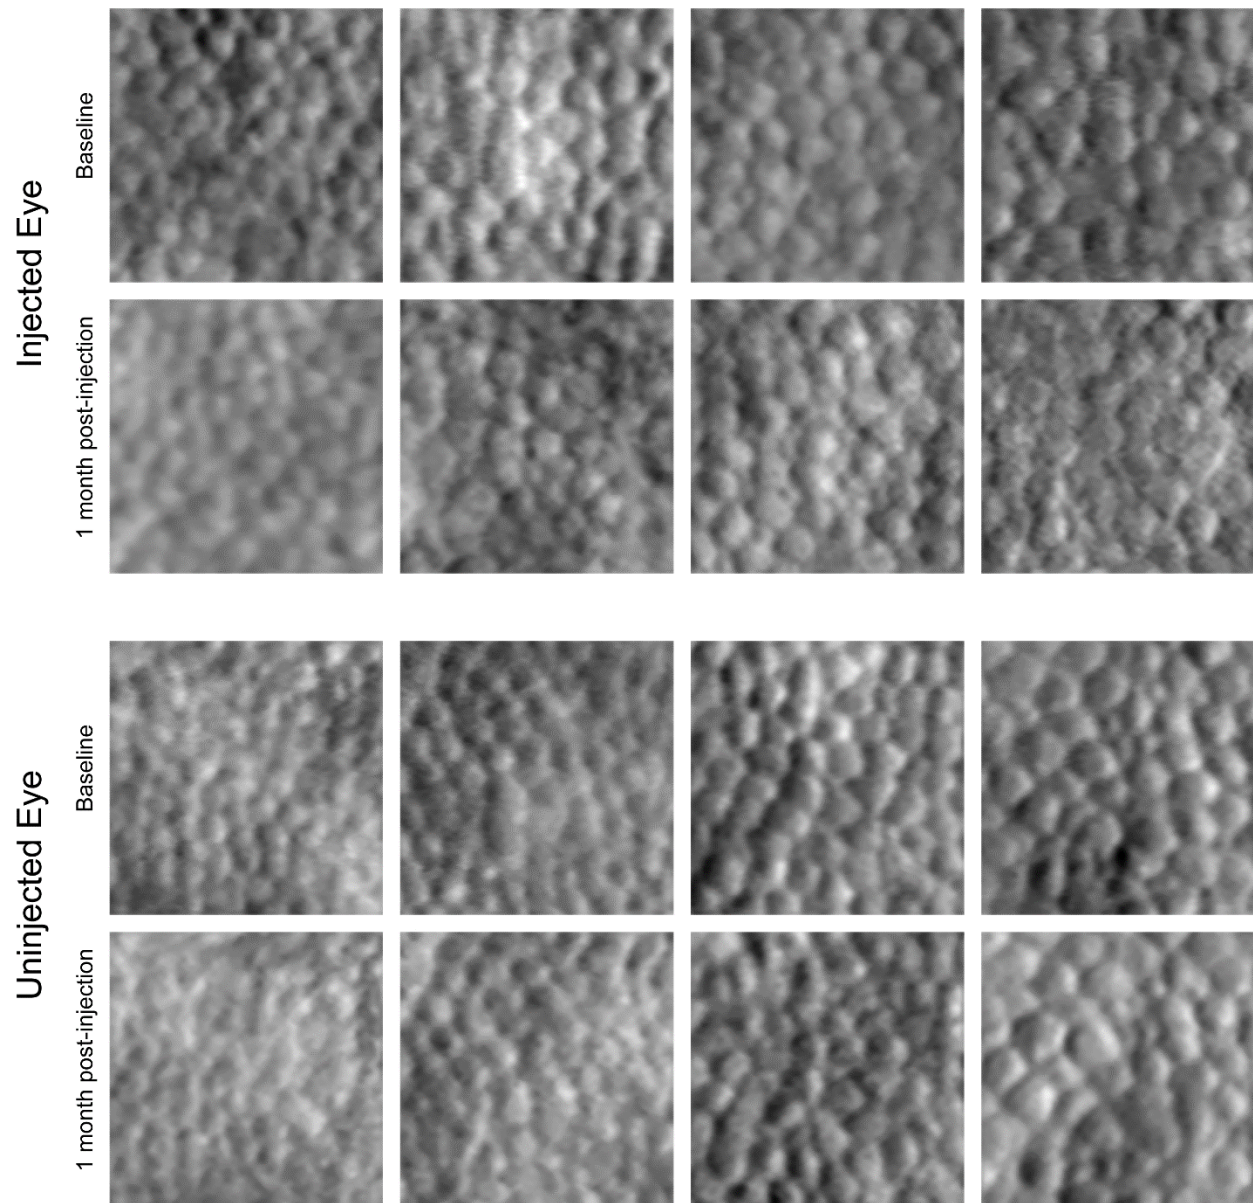

87

88 **Supplemental Figure 14**

89



PN-08

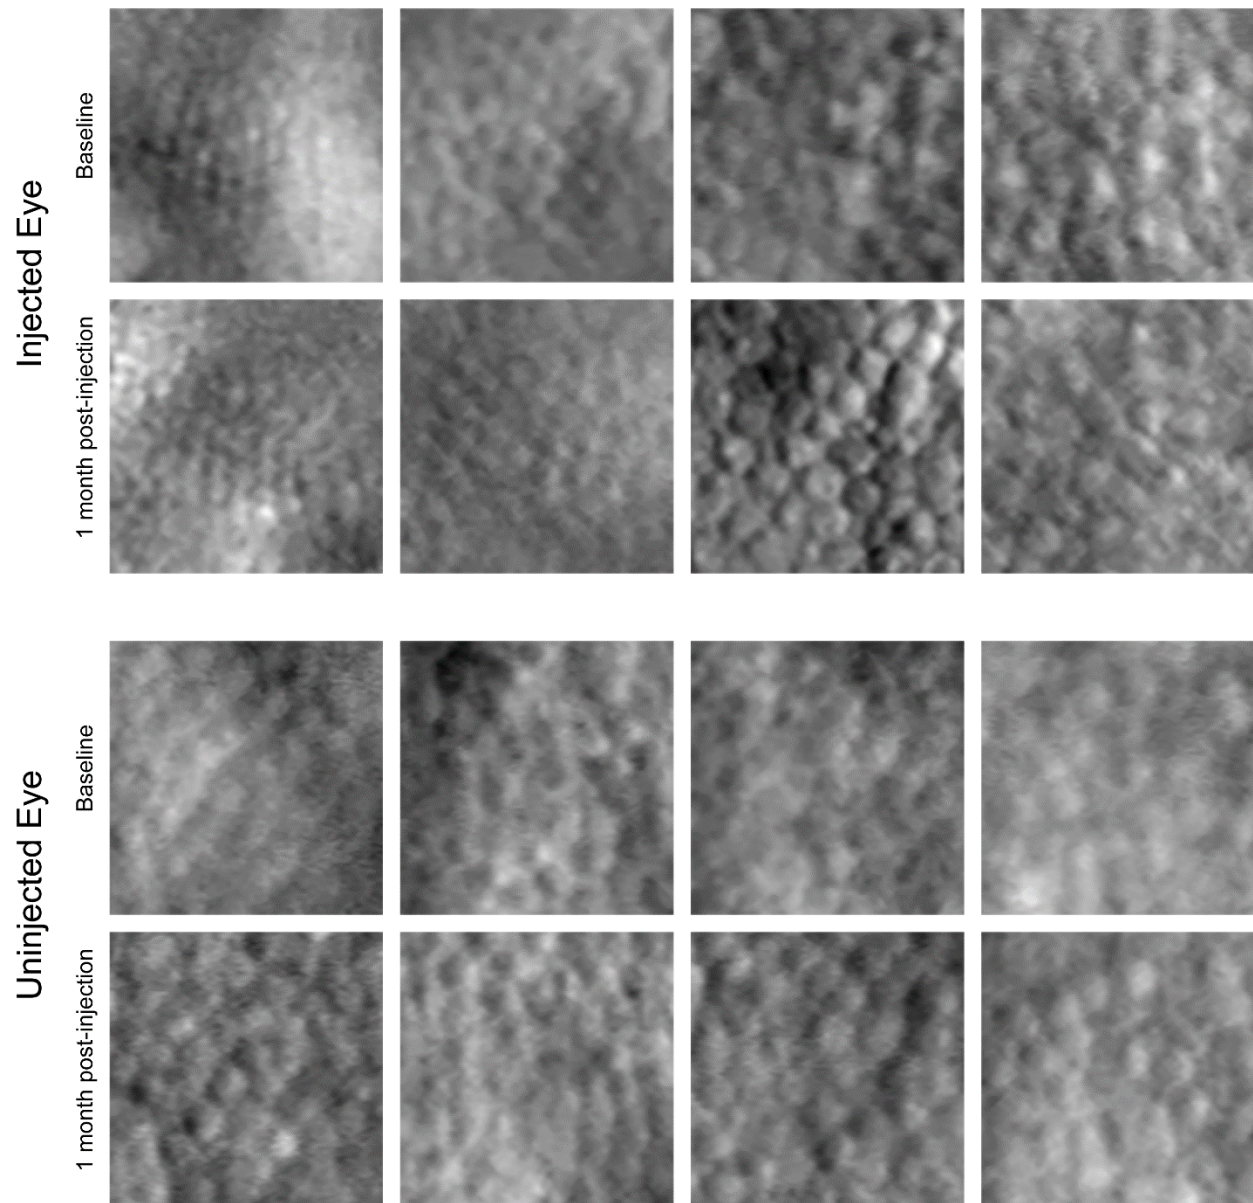

90

91 **Supplemental Figure 15**

92

PN-09

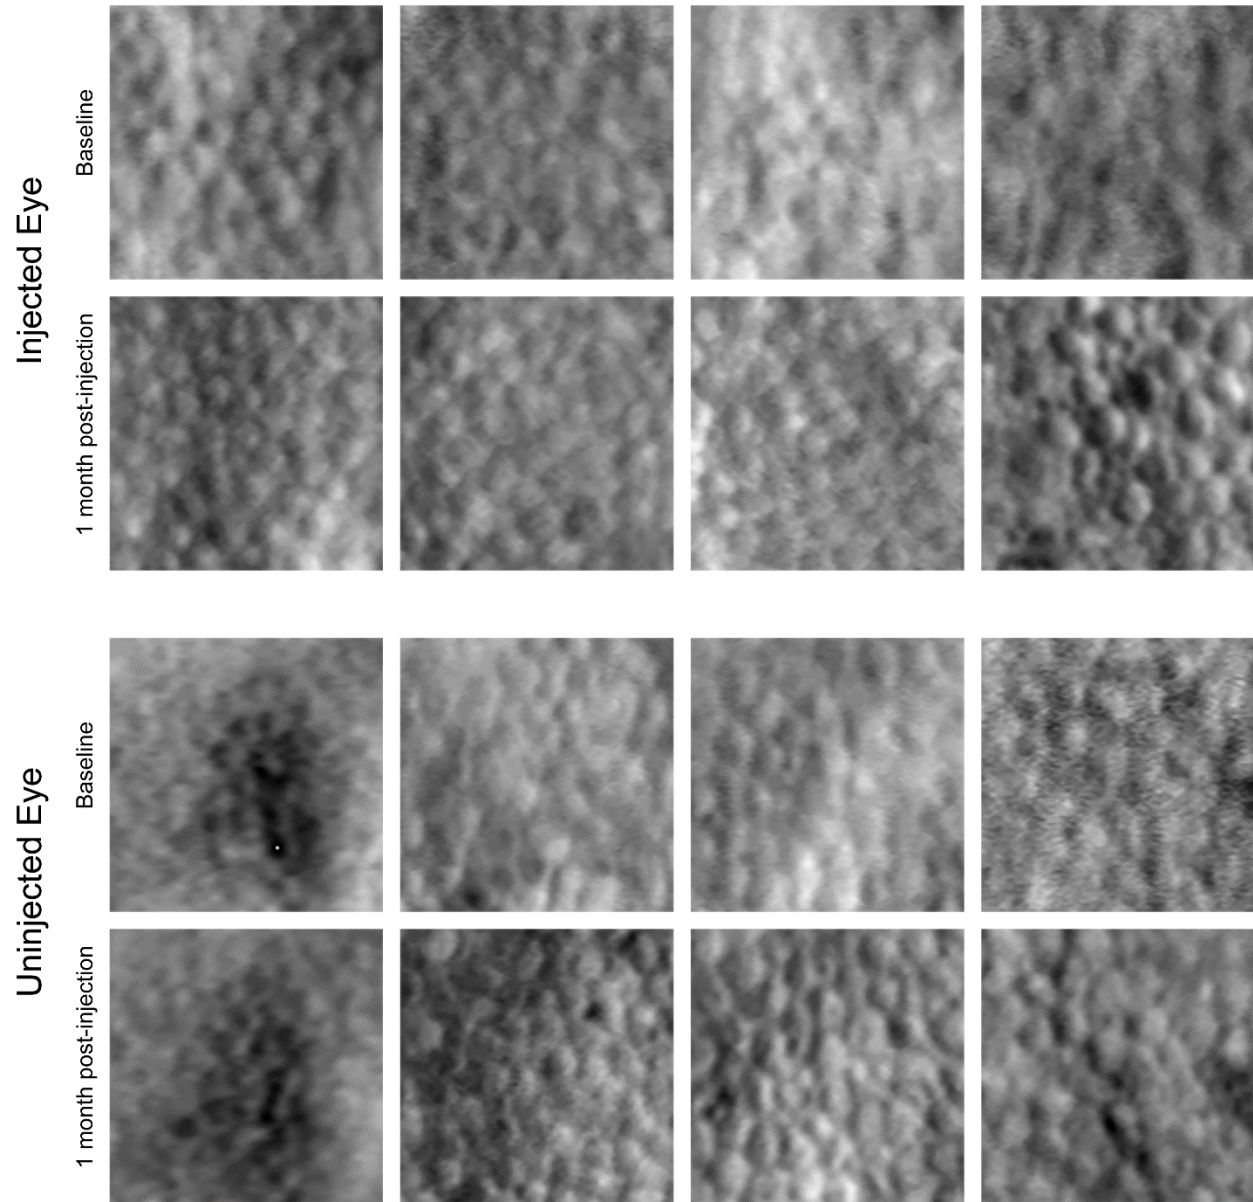

93

94 **Supplemental Figure 16**

95



PN-11

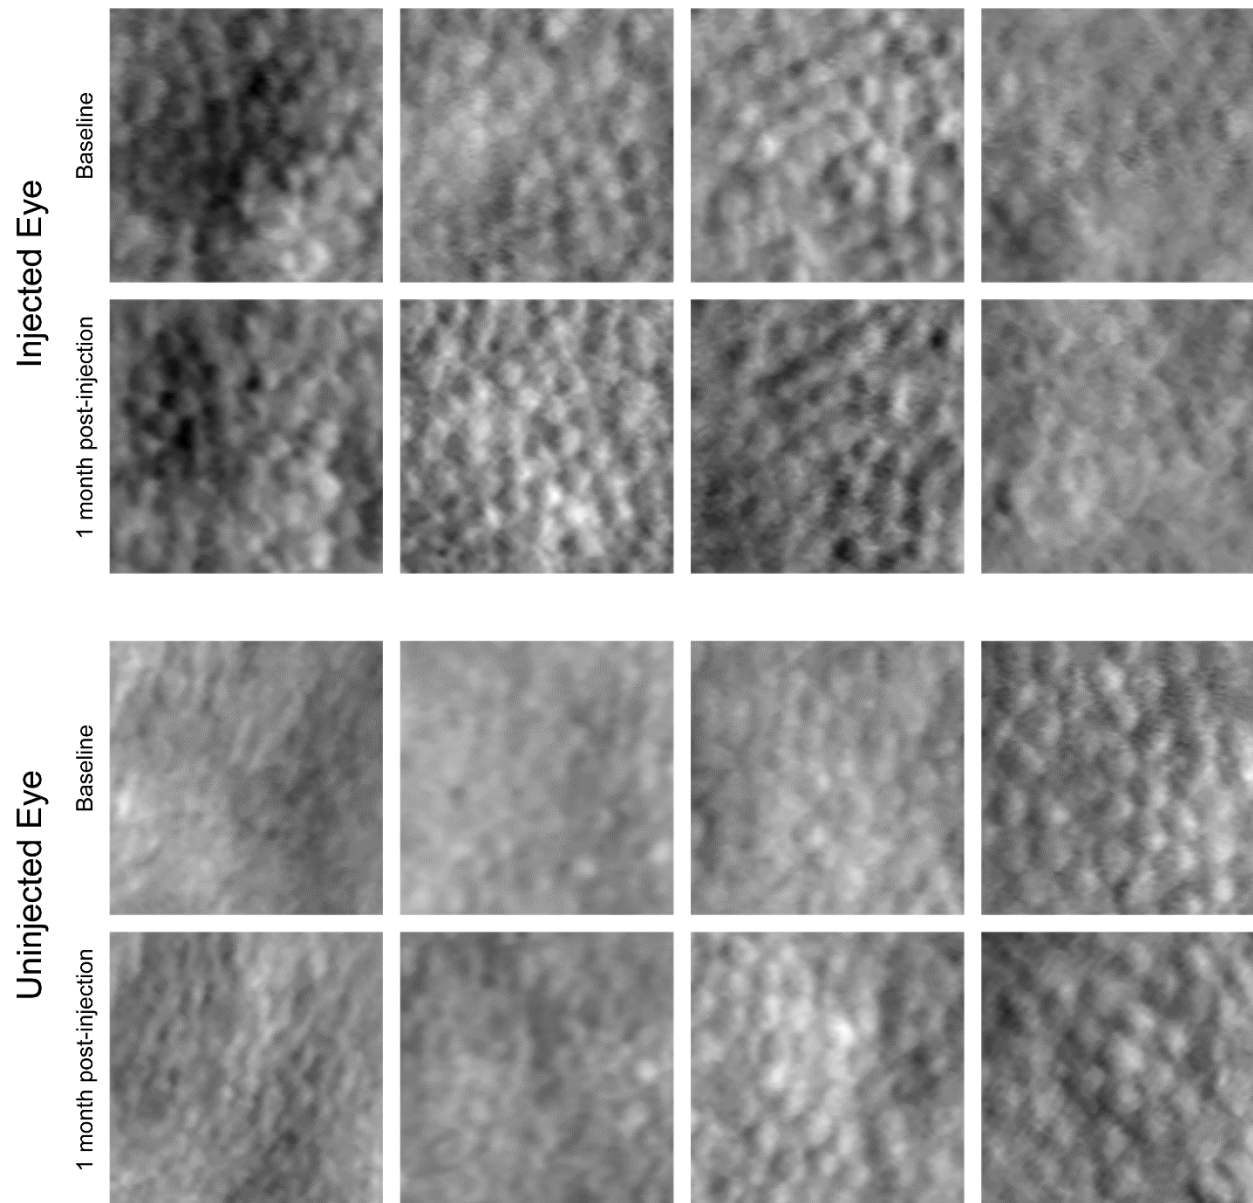

96

97 **Supplemental Figure 17**

98

99
